# Supplementary material for: An Integrated Epigenomic and Genomic View on Phyllodes and Phyllodes-Like Breast Tumors
Source: Preprints.org preprint supplement (doi:10.20944/preprints202112.0366.v1), 2021-12-22
Supplement: Supplementary file 1 [file PT20210527_UMAP6_all_bVals_top_75000.xlsx]

## Sheet: Sheet1
Sentrix_ID	X	Y
10003886252_R03C02	5.67335	6.2521
10003886252_R04C02	7.92336	5.78791
10003886253_R03C01	-5.2915	-4.39253
10003886253_R05C02	15.4093	0.1478
10003886253_R06C02	8.43481	10.7347
10003886256_R01C02	7.36455	5.54464
10003886256_R06C01	-7.33035	-11.2107
10003886258_R02C01	-0.343282	20.3313
10003886258_R02C02	7.83573	5.59897
10003886258_R04C01	-6.27761	-11.6497
10003886258_R05C02	15.8304	0.666707
10003886258_R06C01	7.35599	6.37278
10003886259_R02C01	5.54757	6.77739
10003886259_R03C01	7.51165	6.05909
10003886259_R03C02	7.03231	6.85002
10003886261_R01C01	-6.65446	-11.0916
10003886261_R01C02	-7.11919	-11.3916
10003886261_R02C01	-7.09326	-11.185
10003886261_R02C02	-6.67631	-10.584
10003886261_R03C02	-6.63308	-10.5459
10003886261_R04C01	-6.86144	-10.7682
10003886261_R04C02	-6.71532	-10.5629
10003886261_R05C01	-6.66983	-11.0028
10003886261_R05C02	-7.12	-10.5189
10003886261_R06C01	-6.78469	-10.6834
10003886261_R06C02	-7.10103	-10.5116
10005771148_R01C02	6.62555	6.67352
10005839017_R06C01	-5.62803	-5.61317
10006044112_R03C02	2.35648	1.53085
10006044112_R04C01	2.44283	1.6313
10006044121_R03C02	2.19494	0.648493
10006823005_R01C01	13.5657	-2.18606
10006823005_R02C01	13.5682	-2.18989
10006823005_R03C01	13.5681	-2.19015
10006823005_R04C01	13.5645	-2.18523
10006823005_R05C01	13.5639	-2.17716
10006823022_R03C02	7.56742	5.29233
10006823022_R06C01	5.68681	6.28205
10006823022_R06C02	-6.76927	-10.8997
10006823024_R01C01	-7.10128	-10.4589
10006823024_R05C01	-10.3458	6.46605
10006823024_R06C02	-7.06095	-10.5127
10006823069_R02C01	7.66652	5.15208
10006823069_R04C02	7.96394	6.15861
10006823069_R06C02	5.04819	5.99478
10006823071_R01C02	-6.65932	-10.545
10006823071_R02C02	-7.1094	-10.5048
10006823071_R03C02	-6.90634	-10.5702
10006823122_R01C01	-7.10163	-10.5478
10006823122_R02C01	-7.14553	-10.4577
10006823122_R03C02	8.07726	10.0669
10006823122_R05C02	7.86739	5.92683
10006823123_R01C02	-6.26827	-11.1967
10006823123_R02C01	8.09556	6.55833
10006823123_R05C01	8.08637	11.5391
10006823123_R05C02	-6.2349	-11.0814
10006823123_R06C02	5.42389	5.54448
10006823130_R02C01	5.43937	6.16202
10006823130_R03C01	5.59236	6.72195
10006823130_R04C01	8.26037	10.6889
10006823130_R05C01	8.20789	10.6257
10006823132_R04C02	-4.02232	-4.51897
10006823132_R06C02	15.7174	0.56289
10006823133_R01C02	8.11098	10.0994
10006823133_R05C01	5.89316	6.29535
10006823141_R01C01	8.04146	11.3967
10006823141_R01C02	7.71482	5.80947
10006823141_R02C02	8.02258	11.4809
10006823141_R03C02	2.68761	13.1037
10006823141_R05C01	5.34393	5.66439
10006823143_R03C02	15.9652	0.815371
10006823143_R04C02	-5.69424	-5.68437
10006823144_R01C02	7.62429	5.61901
10006823144_R02C01	7.52058	5.14035
10006823144_R06C02	8.1684	10.3787
10006823155_R02C02	7.99771	11.4157
10006823155_R03C02	7.50643	5.10887
10006823155_R04C02	7.47541	5.4634
10006823155_R06C02	-7.00871	-11.201
10006823160_R05C01	5.50696	6.24099
10006823165_R01C01	7.32895	7.24738
10006823165_R02C01	7.35395	7.28462
10006823165_R04C01	7.36961	7.31727
10011071031_R05C01	4.90403	6.15041
101178130118_R06C01	14.1285	-2.74725
101178130131_R03C02	-3.54043	-5.75661
101231000003_R01C01	-4.93948	-5.33208
101231000003_R02C01	-4.92589	-5.28425
101231000003_R03C01	-4.94161	-5.30565
101231000003_R06C01	-3.82986	-4.21669
101231000005_R03C01	-2.51797	-3.25583
101231000009_R04C02	8.10869	-6.86621
101231000014_R01C02	2.91648	12.2936
101231000026_R02C02	-2.82308	-6.02146
101231000026_R06C02	2.41579	-11.3643
101231000030_R03C02	7.48863	6.40996
101231000035_R01C02	1.518	-15.53
101231000037_R02C01	1.51809	-15.5304
101231000037_R02C02	-4.48872	-3.977
101231000037_R03C02	-4.58713	-3.97717
101231000037_R04C01	1.51791	-15.5297
101231000037_R05C01	1.51813	-15.5304
101231000137_R01C02	-3.85085	-4.22625
200078650174_R03C01	13.5738	-2.20606
200091640026_R02C01	-3.83513	-4.19922
200091640035_R02C02	4.52342	4.00618
200091640035_R03C02	5.37513	-10.7571
200091640035_R05C02	4.54474	4.02731
200091640036_R01C01	-5.70303	-5.6844
200091640036_R03C02	-5.62275	-5.51309
200091640036_R04C01	-5.72284	-5.71109
200091640036_R04C02	-3.8451	-4.20054
200091640036_R05C01	-5.72895	-5.72077
200091640036_R06C02	-3.83704	-4.23128
200091640041_R01C01	-5.68283	-5.6758
200091640050_R05C02	11.2707	-2.78133
200091640051_R01C01	11.2717	-2.77822
200091640051_R01C02	11.2813	-2.77192
200091640051_R03C01	11.2595	-2.79326
200091640051_R03C02	11.259	-2.79393
200091640051_R04C02	11.2646	-2.78695
200091640051_R06C01	11.2722	-2.77727
200091640051_R06C02	8.11938	10.0906
200091640058_R01C01	-3.51485	-5.73669
200091640059_R02C01	5.3131	5.13124
200091640059_R02C02	-7.3076	-11.3724
200109360096_R04C01	-3.8312	-4.24463
200256300120_R05C02	2.41684	-11.3641
200275560089_R06C02	5.92521	6.27811
200275560098_R02C02	6.15269	6.41552
200275560113_R05C02	5.74412	6.3087
200277210036_R02C01	-2.84233	-6.00744
200277210073_R05C01	6.08395	6.42506
200277210145_R01C02	0.133625	13.3718
200277210145_R06C01	0.118992	13.3524
200325530023_R05C01	-6.66744	-10.48
200325530093_R04C02	-2.99826	-5.73477
200325530097_R05C02	-6.53729	-5.04915
200325530098_R01C01	-6.45592	-4.99314
200325530098_R02C01	-6.47849	-5.00039
200325530098_R02C02	-6.51807	-5.0246
200325530098_R03C01	8.10423	-6.86094
200325530098_R03C02	-6.51671	-5.03199
200325530098_R04C01	-6.46782	-4.98997
200325530098_R04C02	-6.52476	-5.0379
200325530098_R05C01	8.1068	-6.8641
200325530098_R06C01	-6.53471	-5.04059
200325530099_R01C01	8.1078	-6.86555
200325530099_R02C01	-6.52165	-5.03236
200325530099_R02C02	-6.51438	-5.02048
200325530099_R03C01	-6.5411	-5.04639
200325530099_R03C02	-6.52712	-5.03719
200325530099_R04C01	-6.54507	-5.04966
200325530099_R05C02	-6.52788	-5.03685
200325530099_R06C02	-6.52797	-5.03732
200325530100_R02C01	-6.56406	-5.02084
200325530100_R03C02	-6.51543	-5.02665
200325530101_R01C01	-6.56038	-5.06157
200325530101_R03C02	4.54484	4.02693
200325530101_R04C01	-6.49376	-4.99957
200325530101_R04C02	4.54641	4.02718
200325530101_R05C02	4.52976	4.01093
200325530101_R06C01	-6.48281	-4.98902
200325530103_R04C01	5.34433	-10.7794
200325530104_R01C02	10.3432	-2.98374
200325530104_R02C02	10.346	-2.97901
200325530104_R03C02	10.3433	-2.98367
200325530104_R05C01	10.3441	-2.98155
200325530104_R05C02	10.3436	-2.98223
200325530104_R06C01	10.3483	-2.97867
200325530104_R06C02	10.3423	-2.96753
200325530105_R01C02	10.3428	-2.98472
200325530105_R02C01	10.3842	-2.95484
200325530105_R02C02	10.3459	-2.9797
200325530105_R03C01	10.3437	-2.98329
200325530105_R03C02	10.3446	-2.97916
200325530105_R04C01	10.3442	-2.98101
200325530105_R04C02	10.3253	-3.00862
200325530105_R05C01	10.3461	-2.97936
200325530105_R05C02	10.3449	-2.98069
200325530105_R06C01	10.3469	-2.9793
200325530105_R06C02	10.3419	-2.97917
200325530107_R01C01	10.3438	-2.98135
200325530107_R02C01	10.3462	-2.98198
200325530107_R02C02	4.56077	4.0437
200325530107_R03C01	10.3431	-2.98358
200325530149_R01C01	-2.83099	-6.03336
200325530149_R01C02	-2.34606	-6.35903
200325530149_R02C01	-2.78144	-6.0536
200325530149_R03C01	-2.8694	-5.97916
200325530149_R04C01	-2.78868	-6.0507
200325530149_R04C02	-4.52758	-3.37585
200325530149_R05C01	-2.87231	-5.97173
200325530149_R05C02	-4.50765	-3.3225
200325530149_R06C02	-4.49248	-3.2738
200325530150_R01C01	-4.57662	-3.40245
200325530150_R02C01	-4.52323	-3.35449
200325530150_R03C01	-4.47735	-3.42991
200325530150_R04C01	-4.50821	-3.31394
200325530150_R05C01	-4.54051	-3.33604
200325530150_R05C02	-4.47699	-3.21799
200325530166_R03C01	-6.88819	-10.7601
200325530180_R01C02	1.67698	-5.91129
200325530180_R02C02	1.66587	-5.91574
200325530180_R03C02	1.66337	-5.89504
200325530180_R04C02	1.64199	-5.89134
200325530180_R05C01	1.6177	-5.84972
200325530180_R05C02	-3.52086	-1.08625
200325530180_R06C01	1.64641	-5.87587
200325530180_R06C02	1.66267	-5.91137
200360420020_R01C02	10.3452	-2.98081
200360420020_R02C02	10.3413	-2.99424
200360420020_R03C02	10.3431	-2.98101
200360420020_R04C02	-2.85434	-5.99078
200360420020_R05C01	10.3475	-2.98912
200360420020_R05C02	-2.854	-5.99481
200360420020_R06C02	-2.79859	-6.04592
200360420060_R05C02	0.131867	13.3571
200360420062_R04C02	-7.07791	-10.4781
200362700006_R02C01	1.65117	-5.88434
200362700065_R06C02	-6.72277	-10.6706
200362700196_R04C02	-5.18302	-3.46728
200362700204_R02C02	-5.16699	-3.51308
200362700204_R03C02	-5.21259	-3.36031
200362700204_R04C02	-5.18129	-3.49246
200362700204_R05C02	-5.19266	-3.44873
200362700204_R06C01	-5.16006	-3.4575
200383880131_R01C01	-5.16757	-4.70675
200383880131_R02C01	-5.37833	-4.69835
200383880131_R03C01	-5.16016	-4.61619
200383880131_R04C01	-5.36938	-4.6915
200394870010_R05C02	-7.05498	-11.2809
200394870010_R06C02	-6.88211	-11.003
200394870072_R02C02	-2.89749	0.0649302
200394870074_R01C02	-4.91809	-4.53424
200394870074_R02C02	-4.87715	-4.45895
200394870074_R03C02	-4.89557	-4.56181
200394870074_R04C01	-4.91008	-4.51327
200394870074_R04C02	-4.93397	-4.3187
200394870074_R05C01	-4.88022	-4.38762
200394870086_R05C02	-2.83097	-6.01661
200394970004_R01C02	-4.95914	-5.31858
200394970004_R02C02	-7.15375	-11.265
200394970004_R05C02	5.35837	-10.7547
200394970024_R02C02	-7.1825	-11.3734
200394970025_R04C02	-5.66162	-5.62048
200394970026_R05C02	-4.35653	-3.97584
200394970030_R01C02	-5.45835	-3.18495
200394970030_R03C02	-5.67422	-2.98281
200394970045_R05C02	-5.65379	-5.63191
200394970071_R02C02	-7.06059	-11.363
200394970071_R04C01	-7.17272	-10.6925
200394970071_R06C02	-6.88674	-11.3082
200394970072_R01C02	-7.03373	-11.2495
200394970072_R02C01	-7.15364	-11.2485
200394970072_R02C02	-6.77033	-11.342
200394970072_R03C01	-6.24947	-11.4951
200394970072_R04C01	-6.90777	-11.1921
200394970072_R04C02	-6.8789	-11.2918
200394970072_R05C01	-7.07967	-11.2319
200394970072_R06C01	5.37621	5.05024
200394970077_R01C01	-6.79505	-11.2967
200394970077_R02C01	-6.93277	-11.181
200394970077_R02C02	-6.48869	-10.8448
200394970077_R03C01	-6.73064	-10.6907
200394970077_R03C02	-7.12894	-11.4293
200394970077_R04C01	-6.93502	-11.1763
200394970077_R05C02	-7.07103	-11.3761
200394970077_R06C01	-6.835	-11.4084
200394970092_R01C01	-6.82188	-10.9741
200394970092_R03C01	-7.07332	-11.4108
200394970092_R03C02	-6.8285	-11.0952
200394970092_R05C01	-7.00556	-11.2684
200394970095_R01C01	-7.13763	-11.1679
200394970095_R02C01	-7.2702	-11.2295
200394970118_R01C02	-6.707	-10.6168
200394970118_R02C02	-7.17185	-11.3974
200394970118_R03C02	-6.93257	-10.6316
200394970118_R04C02	-6.22111	-11.56
200394970118_R05C01	-6.3751	-11.423
200394970118_R05C02	-6.73082	-10.6148
200394970118_R06C01	-6.27276	-11.6666
200394970118_R06C02	-6.6554	-10.6054
200394970119_R01C01	-6.67857	-10.5308
200394970119_R01C02	-6.32558	-11.3777
200394970119_R02C01	-6.84277	-11.0468
200394970119_R03C01	-6.9738	-11.2749
200394970119_R03C02	-7.1106	-11.4423
200394970119_R04C01	-6.83046	-10.9481
200394970119_R05C01	-7.03371	-11.425
200394970119_R06C01	-6.80985	-11.1601
200394970131_R01C02	-6.23275	-11.6676
200394970131_R02C02	-6.14078	-11.4959
200394970131_R03C01	-6.98129	-11.1244
200394970131_R03C02	-6.66948	-10.4523
200394970131_R04C02	-6.5552	-10.5017
200394970131_R05C02	-6.14163	-11.6214
200394970131_R06C01	-6.58416	-11.4391
200394970131_R06C02	-6.71419	-10.8776
200394970133_R01C01	-6.68375	-10.4637
200394970133_R01C02	-6.96527	-11.2421
200394970133_R02C02	-6.39764	-11.5805
200394970133_R03C01	-6.21114	-11.6695
200394970133_R03C02	-6.17738	-11.7373
200394970133_R04C01	-6.51089	-10.553
200394970133_R04C02	-6.76022	-11.3552
200394970133_R05C01	-7.02091	-11.3302
200394970133_R05C02	-6.7329	-10.9773
200394970133_R06C01	-6.88163	-11.2756
200394970133_R06C02	-7.04896	-11.367
200394970134_R01C01	-6.40412	-11.3408
200394970134_R01C02	-6.93914	-11.2486
200394970134_R02C01	-6.5647	-10.5352
200394970134_R02C02	-6.62612	-11.0755
200394970134_R03C01	-6.17188	-11.5854
200394970134_R03C02	-6.17196	-11.6733
200394970134_R04C01	-6.67859	-10.4583
200394970134_R04C02	-6.6527	-10.4434
200394970134_R05C01	-7.04083	-11.3626
200394970134_R06C01	-6.1237	-11.6337
200394970134_R06C02	-6.94423	-11.3281
200394970136_R01C01	-7.03382	-11.2778
200397540005_R01C02	-7.12082	-10.4796
200397540005_R02C02	-6.91934	-11.2952
200397540005_R03C01	-7.16447	-11.4489
200397540005_R05C01	-7.12995	-11.4546
200397540005_R06C01	-6.61243	-10.8579
200397540010_R01C01	-4.87999	-5.08866
200397540010_R01C02	-6.28457	-11.4075
200397540010_R02C02	-7.05114	-11.3322
200397540010_R03C01	-3.84265	-4.89948
200397540010_R04C02	-6.46205	-11.4798
200397540010_R05C02	-6.77354	-10.9455
200397540010_R06C02	-6.40834	-11.3521
200397540013_R01C01	-7.08377	-10.5478
200397540013_R02C01	-6.88629	-10.9786
200397540013_R02C02	-7.31593	-11.3822
200397540013_R03C01	-6.65833	-10.514
200397540013_R04C02	-6.63837	-10.5738
200397540013_R05C01	-6.81273	-10.7251
200397540013_R05C02	-6.80948	-10.7637
200397540013_R06C02	-6.63074	-11.1155
200397540023_R01C01	-6.5545	-10.6553
200397540023_R01C02	-6.83632	-10.7655
200397540023_R02C01	-7.05341	-11.2913
200397540023_R02C02	-6.66909	-10.4836
200397540023_R03C01	-6.87768	-10.8757
200397540023_R03C02	-6.852	-10.638
200397540023_R04C01	-6.61914	-10.9232
200397540023_R04C02	-6.81899	-10.6473
200397540023_R05C01	-6.77328	-10.5781
200397540023_R05C02	-7.165	-11.4654
200397540023_R06C01	-6.54466	-10.7738
200397540023_R06C02	-7.04279	-11.2519
200397540024_R01C01	-6.56044	-10.5429
200397540024_R01C02	-7.24184	-11.3014
200397540024_R02C01	-6.24336	-11.6692
200397540024_R02C02	-6.51788	-11.4651
200397540024_R03C02	-7.08171	-11.1982
200397540024_R04C01	-7.1264	-11.4019
200397540024_R04C02	-6.95291	-11.22
200397540024_R05C01	-7.08946	-11.4224
200397540024_R06C01	-6.95757	-11.4092
200397540073_R01C02	-7.10835	-11.2823
200397540073_R02C01	-6.76183	-11.3366
200397540073_R02C02	-6.60938	-11.1262
200397540073_R03C01	-7.33799	-11.3432
200397540073_R04C01	-7.18839	-11.1683
200397540073_R04C02	-7.02656	-10.5554
200397540073_R05C01	-7.03004	-11.2373
200397540073_R05C02	-6.83824	-11.2609
200397540073_R06C02	-6.3124	-11.6549
200397540075_R01C01	-7.06911	-10.5549
200397540075_R01C02	-7.0747	-10.9645
200397540075_R02C01	-7.10438	-11.0209
200397540075_R02C02	-6.26619	-11.6496
200397540075_R03C01	-6.7811	-10.6839
200397540075_R03C02	-6.80626	-10.5758
200397540075_R04C01	-6.86878	-11.2808
200397540075_R04C02	-6.82202	-11.2756
200397540075_R05C01	-6.74238	-10.6091
200397540075_R06C01	-6.95518	-11.1333
200397540075_R06C02	-6.18713	-11.7018
200397540079_R01C01	-6.35659	-11.352
200397540079_R01C02	-7.12188	-11.1371
200397540079_R02C01	-6.78711	-11.1421
200397540079_R02C02	-6.69986	-11.0107
200397540079_R03C01	-6.99803	-10.5655
200397540079_R04C01	-7.01617	-10.5544
200397540079_R04C02	-6.38504	-11.5545
200397540079_R05C01	-6.98875	-11.2936
200397540079_R05C02	-7.01639	-11.1728
200397540079_R06C02	-7.04481	-11.2565
200397860004_R02C01	-7.08297	-11.1803
200397860004_R03C01	-6.68959	-10.6792
200397860004_R04C01	-7.0658	-11.1124
200397860004_R05C01	-7.18628	-11.2128
200397860004_R06C01	-6.67063	-10.5266
200397860028_R03C01	-3.15484	-5.34923
200397860029_R01C01	-4.25303	-4.24142
200397860029_R01C02	-5.37166	-3.98861
200397860029_R02C01	1.66739	-5.89901
200397860029_R03C01	1.66225	-5.91619
200397860029_R05C02	1.57189	-5.79999
200397860030_R03C01	-4.28006	-3.64286
200397860055_R06C02	-2.81004	-6.03304
200397860056_R05C01	-3.77214	-4.76655
200397860074_R04C02	1.51805	-15.5302
200397860108_R01C02	-4.31072	-4.05581
200397860108_R02C02	2.38265	-11.3331
200397860110_R04C01	-2.36185	-6.3449
200397870025_R03C02	-2.7689	-6.0755
200397870025_R04C02	-2.77924	-6.0675
200397870025_R06C02	-11.3256	4.85613
200397870027_R05C02	-5.47245	-4.01118
200397870033_R01C01	-2.38713	-6.32481
200397870059_R02C01	-5.35335	-3.95094
200400320082_R02C02	-5.3912	-4.71046
200400320082_R06C02	-4.24743	-4.58629
200400320088_R06C02	-6.63689	-10.5046
200406080010_R06C02	2.41348	-11.3625
200406080065_R01C01	2.40411	-11.3552
200406080065_R01C02	-4.93375	-5.28689
200406080065_R02C01	2.40694	-11.3638
200406080065_R02C02	-4.93766	-5.27868
200406080065_R04C01	8.10744	-6.86425
200406080065_R06C01	-4.94318	-5.31187
200406080083_R01C01	-6.77412	-3.8905
200406080083_R02C02	-4.81895	-4.7706
200406080083_R03C02	-11.3262	4.85569
200406080083_R04C01	-4.22442	-4.35448
200406080083_R04C02	-4.29158	-4.55592
200406080083_R05C01	-4.58643	-4.63918
200406080083_R05C02	-4.9229	-5.24496
200406080083_R06C01	-6.79072	-3.87381
200406080083_R06C02	-3.85442	-4.62419
200406080086_R03C02	-7.05295	-11.2688
200406080086_R05C02	-6.78853	-11.1502
200406080086_R06C02	-6.77136	-10.4603
200406080088_R01C01	-4.36075	-4.03868
200406080089_R03C01	-6.50757	-5.0282
200486890026_R03C02	-6.53892	-11.3539
200486890026_R04C02	-6.86051	-10.81
200486890026_R06C02	-6.79849	-10.6832
200486890029_R05C02	-4.44327	-3.07467
200511460046_R01C02	-4.94825	-5.30956
200511460047_R01C01	-5.53062	-5.50039
200511460047_R01C02	-5.66937	-5.63235
200511460047_R03C02	4.54486	4.02758
200511460047_R04C01	-5.70068	-5.68615
200511460047_R05C01	-5.75161	-5.7436
200511460095_R01C01	5.37171	-10.7614
200511460095_R02C01	0.1951	13.3918
200511510045_R01C01	-4.3135	-4.09057
200511510045_R02C01	-2.35288	-6.35756
200512330096_R06C01	-5.53362	-3.14199
200512330096_R07C01	-5.68617	-2.99329
200512330096_R08C01	-5.70303	-2.91838
200512330130_R05C01	-5.40454	-3.21238
200512330130_R08C01	-5.71942	-2.97027
200514030106_R01C01	1.67619	-5.91828
200514030106_R02C01	1.68009	-5.91569
200514030106_R03C01	1.67525	-5.91022
200514030106_R04C01	1.68084	-5.91462
200514030106_R05C01	1.67651	-5.91164
200514030106_R06C01	1.68022	-5.91718
200514030106_R07C01	1.67626	-5.90984
200514030106_R08C01	1.67711	-5.91398
200550900061_R01C01	1.6794	-5.91557
200550900061_R02C01	1.67344	-5.90937
200550900061_R03C01	1.64452	-5.88131
200550900061_R04C01	1.67723	-5.91316
200550900061_R05C01	1.67642	-5.91081
200550900061_R06C01	1.70399	-5.94739
200550900061_R07C01	1.62259	-5.85473
200550900061_R08C01	1.67471	-5.90883
200550900073_R01C01	1.67598	-5.91531
200550900073_R02C01	1.68374	-5.92552
200550900073_R04C01	1.67803	-5.9117
200550900073_R05C01	1.67831	-5.91386
200550900073_R06C01	1.67697	-5.91576
200550900073_R07C01	1.66733	-5.90812
200550900084_R01C01	1.66502	-5.90937
200550900084_R02C01	1.67821	-5.91539
200550900084_R03C01	1.68768	-5.91186
200550900084_R04C01	1.67994	-5.91659
200550900084_R05C01	1.67658	-5.90923
200550900084_R06C01	1.64467	-5.88333
200550900084_R07C01	1.67092	-5.91918
200550900084_R08C01	1.67391	-5.91092
200550900090_R01C01	1.70129	-5.93621
200550900090_R02C01	1.68349	-5.91828
200550900090_R03C01	1.67797	-5.91465
200550900090_R05C01	1.6747	-5.90978
200550900090_R06C01	1.68025	-5.91525
200550900090_R08C01	1.67693	-5.91219
200687170043_R03C02	-3.36199	-5.58891
200772270037_R06C01	-4.29732	-3.69073
200772270037_R07C01	-4.59025	-3.89172
200772270037_R08C01	-4.09135	-3.57104
200772270038_R02C01	-4.39412	-3.89114
200772270038_R03C01	-4.04121	-3.54257
200772270038_R04C01	-4.09772	-3.54486
200772270038_R05C01	-4.04238	-3.47692
200772280060_R03C01	-9.44202	2.32081
200772280060_R04C01	-9.43629	2.31412
200772280060_R05C01	-9.44054	2.31876
200772280060_R06C01	-9.43703	2.31454
200772280060_R07C01	-9.43744	2.31463
200772280060_R08C01	-9.44327	2.32267
200772300008_R01C01	-9.44143	2.31979
200772300008_R02C01	-9.44067	2.31912
200772300008_R03C01	-9.43873	2.31642
200772300008_R04C01	-9.43438	2.31112
200772300008_R05C01	-9.4375	2.31437
200772300008_R06C01	-9.43545	2.31228
200772300036_R01C01	-4.02843	-4.02463
200772300036_R02C01	-4.1099	-4.25969
200772300036_R04C01	-4.57902	-4.19124
200772300041_R06C01	-6.52693	-5.04605
200784530003_R02C01	-4.12189	-3.54907
200784530003_R04C01	-4.05767	-3.45293
200784530003_R07C01	-4.12861	-3.52704
200784530099_R01C01	-5.06398	-4.22123
200784530099_R02C01	-4.69974	-4.47812
200790260042_R05C01	-9.44181	2.3201
200790260059_R03C01	-4.20237	-4.26739
200790260059_R05C01	-4.69465	-3.82129
200793300001_R04C01	-5.12257	-4.27512
200793300001_R07C01	-3.71945	-4.67734
200793300003_R05C01	-3.91453	-4.43471
200793300003_R06C01	-5.03912	-4.27156
200793820067_R05C01	-5.00678	-4.16315
200848860086_R01C01	10.3445	-3.00695
200848860086_R02C01	10.3457	-3.00922
200848860086_R03C01	10.3425	-3.0101
200848860086_R04C01	10.3445	-2.9996
200848860086_R05C01	10.3452	-2.99962
200848860086_R06C01	10.3467	-3.00298
200848860086_R07C01	10.3441	-3.01189
200848860094_R01C01	10.3412	-3.01475
200848860094_R02C01	10.3385	-2.998
200848860098_R06C01	-4.55016	-3.78341
200848860098_R08C01	-4.26008	-3.55425
200848860099_R05C01	-1.9348	-5.61874
200848860099_R07C01	-4.93516	-4.38563
200848860099_R08C01	-4.93002	-4.33676
200848860106_R01C01	-4.95156	-4.31952
200848860106_R02C01	-4.81753	-4.37485
200848860106_R03C01	-4.82778	-4.38585
200848860106_R04C01	-4.87894	-4.38523
200848860106_R05C01	-4.81592	-4.33104
200848860106_R06C01	-4.91429	-4.31117
200848860106_R07C01	-4.87825	-4.50242
200848860109_R02C01	-5.52629	-5.51715
200848860109_R03C01	-7.89227	-4.51261
200848860109_R06C01	-3.14501	-5.37541
200848860112_R08C01	-5.05251	-3.85525
200848860119_R01C01	-4.99246	-3.93527
200848860124_R01C01	-0.82542	-3.65439
200848860134_R08C01	-1.92081	-5.62393
200848860136_R01C01	-1.91305	-5.63039
200861300051_R02C01	-0.829138	-3.62537
200861300051_R03C01	-0.828401	-3.6722
200861300051_R04C01	-1.56071	5.57094
200861300051_R05C01	-0.832022	-3.69182
200861300051_R06C01	-0.827067	-3.68819
200875800080_R01C01	-5.0886	-4.20722
200875800080_R02C01	-5.05471	-4.14721
200875800080_R03C01	-5.46368	-3.12915
200875800080_R06C01	-2.37387	-6.32939
200876170027_R01C01	-5.10941	-4.26959
200876170093_R06C01	0.0813565	13.329
200876170093_R07C01	0.0696586	13.3235
200876170093_R08C01	0.0782834	13.3275
200876170101_R01C01	0.0664631	13.3213
200876170101_R02C01	0.0847796	13.3324
200876170101_R03C01	0.0843163	13.331
200876170101_R04C01	0.0709528	13.325
200876170101_R05C01	0.0792359	13.3274
200876170101_R06C01	0.0838798	13.3328
200889820088_R01C01	-5.6707	-5.65251
200889820088_R02C01	-5.67551	-5.66672
200889820088_R03C01	-7.96687	-4.55077
200889820089_R07C01	-3.67	-4.68273
200889820089_R08C01	-3.65397	-4.70651
200889820111_R02C01	-2.90764	-5.94833
200925700107_R07C01	-2.86392	-5.98065
200925700108_R02C01	-3.71665	-4.64322
200925700108_R03C01	-3.75223	-4.69495
200925700108_R06C01	-3.70837	-4.67818
200925700120_R01C01	-3.78651	-4.60196
200925700120_R02C01	-3.62662	-4.68688
200925700120_R04C01	-3.73046	-4.63068
200925700120_R07C01	-3.76899	-4.63564
200925700120_R08C01	-3.87028	-4.56683
200925700124_R02C01	-3.73374	-4.68111
200925700124_R04C01	-3.92932	-4.84136
200925700124_R06C01	-3.90981	-4.63711
200925700125_R07C01	-3.83387	-4.81755
200925700133_R02C01	-3.76438	-4.68375
200925700133_R03C01	-3.83431	-4.6689
200925700133_R04C01	-3.90254	-4.75083
200925700133_R05C01	-3.7578	-4.71192
200925700134_R04C01	-5.09562	-3.92684
200925700210_R06C01	-1.91637	-5.62789
200928190007_R01C01	-1.91553	-5.62971
200928190007_R02C01	-1.91419	-5.63032
200928190007_R03C01	-1.9223	-5.62479
200928190007_R04C01	-1.92395	-5.61905
200928190007_R06C01	-1.91494	-5.63014
200928190007_R07C01	-1.91753	-5.62773
200928190007_R08C01	-2.05377	-5.53483
200928190151_R03C01	-4.19869	-3.48365
200928190151_R05C01	-4.27765	-3.52744
200928190151_R08C01	-4.41973	-3.6702
200928190152_R02C01	-4.70811	-3.97585
200928190152_R05C01	-4.25969	-3.50606
200928190152_R06C01	-4.02891	-3.29776
200928190152_R07C01	-5.4155	-4.02098
200928190152_R08C01	-5.44533	-4.02573
200928190153_R05C01	-5.40376	-4.0269
200928190153_R06C01	-5.41413	-4.02212
200928190153_R07C01	-5.44873	-4.05074
200928190153_R08C01	-5.41924	-4.02069
200928190197_R01C01	-5.38381	-4.0296
200928190197_R03C01	-5.39708	-4.02087
200928190197_R04C01	-5.39029	-4.01091
200928190197_R05C01	-5.39061	-4.00788
200928190197_R08C01	10.3759	-3.03862
200970160060_R05C01	-3.12222	-5.34628
200992270048_R04C01	-4.61044	-4.46564
200992270054_R07C01	2.41697	-11.366
200992340016_R06C01	0.0619022	13.3191
200992340033_R06C01	-4.67861	-4.52753
201057150206_R05C01	-5.38375	-4.83681
201057150206_R06C01	-5.41295	-4.75998
201057150207_R06C01	-5.33462	-4.75609
201096090028_R03C01	-5.3986	-4.71833
201096090028_R04C01	-5.29467	-4.64132
201096090028_R06C01	-5.43715	-4.85723
201096090067_R04C01	-5.34556	-4.71831
201096090067_R05C01	-5.34743	-4.7601
201172580026_R03C01	-6.79426	-3.89555
201194000072_R05C01	-2.36758	-6.33819
201194000076_R01C01	-2.98758	-5.83149
201194000154_R05C01	-11.427	2.09859
201194000160_R06C01	5.37861	-10.7579
201194000168_R06C01	-4.29639	-4.06146
201194010006_R01C01	-4.90414	-4.5949
201194010136_R01C01	-11.329	4.85358
201194010136_R02C01	-2.39541	-6.31219
201194010136_R05C01	-5.66978	-5.65322
201233650032_R01C01	8.48605	10.9797
201233650032_R02C01	-3.0302	0.65618
201233650073_R08C01	7.70107	5.34771
201233650098_R01C01	-3.99165	2.09708
201233650098_R02C01	4.75224	4.91882
201233650098_R03C01	7.72795	5.26352
201233650098_R04C01	-1.91288	6.02091
201233650098_R05C01	5.56337	6.3931
201233650098_R06C01	8.90155	11.2046
201233650098_R07C01	7.68378	5.35294
201233650098_R08C01	4.66993	6.59623
201233650125_R01C01	6.56143	5.51669
201233650125_R02C01	6.92914	5.62118
201233770024_R01C01	7.96671	5.86959
201233770024_R02C01	7.11588	5.54718
201233770024_R03C01	7.24414	7.16925
201233770024_R04C01	7.40116	5.32728
201233770024_R05C01	-5.09354	-4.97891
201233770024_R06C01	7.91196	6.28003
201233770024_R07C01	7.24075	5.35039
201233770024_R08C01	7.40592	5.39678
201247460060_R05C01	-5.39761	-4.27024
201247460060_R07C01	-5.71025	-5.70192
201247460060_R08C01	4.53454	4.01743
201247480004_R02C01	-5.18161	-4.10746
201247480004_R03C01	-4.94391	-4.63057
201247480004_R04C01	-4.90665	-4.48777
201247480004_R05C01	-4.91053	-4.56863
201247480004_R07C01	-5.17488	-3.91554
201247480005_R06C01	-4.65942	-4.61386
201247480005_R07C01	-4.64658	-4.49481
201247480005_R08C01	-4.79888	-4.81002
201247480006_R08C01	-2.84358	-6.0014
201247480009_R01C01	-4.82313	-4.76677
201247480009_R03C01	-4.63271	-4.70023
201247480009_R05C01	-4.25303	-4.30564
201247480012_R08C01	-5.02327	-4.91421
201247480013_R01C01	-4.73463	-4.77405
201247480013_R03C01	-4.68563	-4.53567
201247480013_R04C01	-4.61767	-4.58356
201247480013_R06C01	-4.75397	-4.84447
201247480019_R01C01	-4.68808	-4.75855
201247480019_R02C01	-4.61442	-4.64153
201247480019_R04C01	-4.59893	-4.63193
201247480019_R06C01	-4.48632	-4.53676
201247480022_R03C01	8.10826	-6.86592
201247480023_R02C01	-4.63615	-4.63371
201247480024_R03C01	-4.2607	-4.39386
201247480024_R04C01	-4.723	-4.91769
201332340120_R08C01	-3.98346	-4.25908
201332340139_R01C01	-3.15493	-5.38547
201332340139_R04C01	-4.27061	-4.42322
201332340139_R06C01	8.10631	-6.86557
201332340140_R06C01	-5.50307	-3.15153
201332340140_R08C01	-1.95033	-5.60385
201364900016_R05C01	-4.43904	-3.0633
201364900021_R03C01	-2.36852	-6.33932
201364900048_R02C01	-4.43592	-3.09054
201414140038_R04C01	-5.65778	-5.63463
201414140114_R08C01	-4.21308	-3.55869
201465830032_R08C01	-5.37093	-4.68796
201465830049_R07C01	8.10476	-6.86465
201465830060_R06C01	5.36676	-10.7685
201465900007_R02C01	-4.32746	-3.62663
201465900007_R06C01	-4.48088	-3.22456
201465900009_R05C01	-4.98378	-3.99651
201465900009_R08C01	-4.73236	-3.90761
201465900013_R01C01	-4.97374	-4.0469
201465900013_R03C01	-4.95663	-3.96692
201465900013_R05C01	-5.06952	-3.84418
201465900013_R06C01	-5.0389	-3.88226
201465900013_R07C01	-5.01665	-4.03789
201465900013_R08C01	-5.02841	-4.14835
201465900014_R02C01	-5.09036	-3.81744
201465900014_R03C01	-5.04492	-3.92549
201465900034_R02C01	-4.11942	-4.0645
201465900034_R04C01	-5.18351	-4.23002
201465900034_R05C01	-5.42004	-3.20038
201465900034_R07C01	4.53345	4.01517
201465900036_R01C01	-5.17676	-4.21603
201465900036_R03C01	-4.08596	-3.53639
201465900036_R05C01	-5.68873	-5.67796
201465900036_R08C01	-4.05959	-3.55994
201465900037_R01C01	-2.95208	-5.79076
201465900037_R02C01	-4.67654	-4.60311
201465900037_R03C01	-3.84256	-4.7536
201465900037_R06C01	-3.9516	-4.32269
201465900039_R01C01	2.68969	2.25819
201465900039_R04C01	-4.21022	-4.28542
201465900039_R07C01	-11.4221	2.09402
201465900039_R08C01	-4.13173	-4.43153
201465900044_R02C01	-5.04352	-3.9033
201465900048_R03C01	-2.88188	-5.96014
201465900048_R04C01	-11.4279	2.09888
201465900048_R05C01	-3.11899	0.599873
201465900048_R06C01	-11.4269	2.09811
201465900050_R01C01	-4.1711	-4.10656
201465900050_R02C01	-4.01002	-4.62293
201465900050_R03C01	-4.16231	-4.26606
201465900050_R04C01	5.36973	-10.7688
201465900050_R07C01	-6.45261	-5.03718
201465900050_R08C01	-4.25172	-3.86516
201465900051_R01C01	-4.23253	-4.35068
201465900051_R03C01	-5.50175	-3.13092
201465900054_R05C01	-2.35972	-6.3488
201465900054_R06C01	-5.41128	-4.68523
201465900055_R03C01	-5.43907	-3.16689
201465900055_R04C01	-5.55028	-3.5444
201465900055_R06C01	-5.15616	-3.69194
201465900058_R02C01	-2.34693	-6.35955
201465900058_R05C01	0.0958189	13.3379
201465910026_R04C01	-7.89371	-4.49575
201465910026_R05C01	-3.10344	-5.42197
201465910026_R07C01	-2.7083	-6.05086
201465910039_R05C01	-4.26309	-4.13013
201465910041_R02C01	-7.90516	-4.49953
201465910042_R06C01	-2.83566	-6.00293
201465930022_R06C01	-1.28854	1.74568
201465930047_R01C01	-0.654456	2.47708
201465930047_R02C01	-2.12707	-1.13672
201465930047_R03C01	-3.78684	-0.366246
201465940025_R03C01	5.37363	-10.7617
201465940044_R06C01	-1.24275	1.95207
201465940044_R07C01	-0.39469	2.75104
201465940044_R08C01	-3.48635	-0.231508
201465950019_R02C01	-4.2921	-4.01555
201465950020_R05C01	-4.10937	-3.57729
201465950020_R07C01	-4.06414	-3.54479
201465950021_R01C01	-4.11054	-3.57039
201465950021_R06C01	-3.96134	-3.37609
201465950021_R08C01	-4.11359	-3.55522
201465950022_R02C01	-4.75002	-3.69668
201465950024_R06C01	-5.62864	-5.60992
201465950024_R08C01	-5.31247	-4.13919
201465950027_R02C01	-5.37357	-4.02835
201465950027_R04C01	1.66048	-5.91554
201465950027_R05C01	-5.5323	-3.12478
201465950027_R08C01	-6.51064	-5.0197
201465950028_R01C01	-5.32687	-3.27163
201465950028_R02C01	-11.328	4.85435
201465950028_R03C01	10.3402	-2.98026
201465950028_R04C01	2.41121	-11.3643
201465950028_R05C01	-4.09305	-4.38271
201465950028_R06C01	-3.64867	-4.67633
201465950028_R08C01	-3.50491	-5.77742
201465950029_R02C01	-2.22859	-1.91912
201465950029_R03C01	-4.18705	-4.31592
201465950029_R04C01	10.3373	-3.01806
201465950029_R05C01	5.37802	-10.7553
201465950029_R06C01	5.3756	-10.7589
201465950029_R08C01	-2.5971	2.42725
201465950030_R01C01	-7.8457	-4.46448
201465950030_R02C01	5.36866	-10.7669
201465950030_R03C01	-4.25019	-4.34374
201465950030_R06C01	1.68221	-5.92475
201465950030_R08C01	1.70369	-5.94753
201465950033_R02C01	5.37468	-10.7622
201465950033_R05C01	-5.79158	-2.87928
201465950033_R06C01	-5.50994	-3.14274
201465950033_R07C01	1.6728	-5.90566
201465950034_R02C01	-5.19379	-4.19794
201465950034_R03C01	-5.77845	-2.78141
201465950034_R04C01	5.37545	-10.7617
201465950034_R05C01	5.34987	-10.7838
201465950034_R06C01	-5.36858	-4.64969
201465950038_R03C01	-4.14512	-3.50253
201465950038_R05C01	-4.73883	-3.68295
201465950038_R06C01	-4.87156	-3.78424
201465950039_R05C01	-4.86189	-3.7125
201465950039_R06C01	-4.70662	-3.69548
201465950040_R03C01	-4.7227	-3.70315
201465950042_R08C01	-2.34981	-6.35806
201465960009_R03C01	-2.9094	-5.9435
201465960009_R05C01	-3.70535	-4.69797
201465960016_R07C01	-4.54122	-3.84625
201465960017_R05C01	-4.3887	-3.68743
201465960017_R08C01	-4.39755	-3.70367
201465960018_R02C01	-4.38574	-3.64083
201465960018_R03C01	-4.40629	-3.70157
201465960018_R07C01	-4.38549	-3.66257
201465960019_R03C01	-4.63044	-3.63803
201465960039_R03C01	-7.92042	-4.51338
201465960039_R04C01	-7.96272	-4.55741
201465960039_R05C01	-7.96348	-4.54793
201465960039_R08C01	-7.96068	-4.54566
201465960040_R01C01	-7.97948	-4.56333
201465960040_R08C01	-7.9659	-4.551
201465960041_R01C01	-7.89251	-4.49031
201465960041_R03C01	-7.92749	-4.51234
201465960041_R04C01	-7.9318	-4.52468
201465960041_R06C01	-7.94705	-4.53547
201465960041_R07C01	-7.94765	-4.5396
201465960041_R08C01	-4.67967	-4.49184
201465960042_R01C01	-4.67294	-4.51415
201465960042_R02C01	-4.58463	-4.46676
201465960042_R06C01	-4.77072	-4.45879
201465960042_R08C01	-4.64658	-4.45614
201465960043_R03C01	-4.75167	-4.55594
201465960043_R07C01	-4.70295	-4.4864
201465960044_R01C01	2.38921	-11.3422
201465960044_R02C01	2.40719	-11.3642
201465960044_R03C01	2.41429	-11.3635
201465960044_R05C01	2.4132	-11.3633
201465960044_R06C01	2.41891	-11.3668
201465960045_R01C01	2.41328	-11.3648
201465960045_R02C01	2.41439	-11.3604
201465960045_R03C01	2.38793	-11.3879
201465960045_R04C01	2.39077	-11.3783
201465960045_R05C01	2.41246	-11.3644
201465960045_R06C01	2.41267	-11.3631
201465960045_R08C01	2.40662	-11.348
201465960046_R01C01	2.43296	-11.3679
201465960046_R03C01	-4.09703	-3.55208
201465960046_R04C01	-4.0663	-3.50137
201465960047_R05C01	2.41519	-11.3657
201465960047_R07C01	-5.71149	-2.9408
201465960048_R01C01	-5.10133	-3.5539
201465960048_R02C01	-5.60807	-3.05282
201465970001_R01C01	0.14607	13.3671
201465970003_R07C01	-2.35702	-6.34687
201465970012_R04C01	-3.81962	-4.04062
201465970012_R07C01	-3.8866	-4.13739
201465970012_R08C01	-3.8534	-4.06945
201465970013_R02C01	-3.92424	-4.08307
201465970013_R03C01	-3.82984	-4.06531
201465970013_R06C01	-3.82589	-4.05523
201465970013_R07C01	-3.82711	-4.06665
201465970013_R08C01	-3.82683	-4.06054
201465970014_R01C01	-3.84392	-4.0347
201465970014_R07C01	-3.79245	-4.04902
201465970014_R08C01	-3.83587	-4.05017
201465970015_R01C01	-3.821	-4.05274
201465970015_R02C01	-3.81968	-4.04422
201465970015_R03C01	-3.77	-4.08325
201465970015_R08C01	0.0873111	13.3333
201465970016_R02C01	0.0814686	13.3288
201465970016_R06C01	-2.33308	-6.37423
201465970058_R03C01	-2.86859	-5.97131
201490030020_R03C01	-1.78728	5.84474
201490030243_R05C01	-2.34364	-6.36785
201490030243_R07C01	5.38454	-10.7646
201492560010_R08C01	6.33625	6.19041
201492560021_R04C01	-4.83904	-5.03365
201492560021_R05C01	-4.77032	-4.99636
201492560021_R06C01	-4.71314	-4.97782
201492560021_R07C01	-5.07791	-4.63161
201492560021_R08C01	-4.71754	-4.94761
201492560186_R01C01	-3.61089	-4.754
201492570106_R01C01	7.04553	5.48979
201492570106_R02C01	5.61824	6.48881
201492570106_R03C01	7.65295	6.24854
201492570106_R04C01	6.78568	5.50984
201492570106_R05C01	4.79453	6.45466
201492570205_R01C01	6.28513	6.70038
201492570205_R02C01	3.6418	-5.54741
201492570205_R03C01	6.86654	5.93851
201492570205_R04C01	7.28988	5.39166
201492570205_R05C01	7.70879	5.43988
201492570205_R06C01	-3.8893	2.02668
201492570205_R07C01	7.40837	5.69108
201492570205_R08C01	7.70924	5.30256
201492570217_R01C01	-7.99069	-0.435756
201492570217_R02C01	-4.20454	0.406002
201492570217_R03C01	6.88542	5.64567
201530470018_R03C01	-3.86079	-4.7958
201530470018_R07C01	-2.36328	-6.34216
201530470048_R08C01	-4.80014	-4.99352
201530470054_R01C01	-4.79996	-5.04829
201530470054_R02C01	-4.79663	-5.04629
201530470054_R03C01	-4.74338	-5.0368
201530470054_R04C01	-4.77107	-5.01816
201530470054_R05C01	-4.79303	-5.03387
201530470054_R07C01	-6.22275	-3.62076
201530470054_R08C01	-6.16365	-3.6124
201530470060_R02C01	-6.14306	-3.58679
201530470060_R03C01	-6.22237	-3.62058
201530470060_R05C01	-6.01038	-3.67252
201530470060_R06C01	-6.2035	-3.60538
201530470060_R07C01	-4.21037	-4.90878
201530470060_R08C01	-6.21426	-3.61879
201530480006_R01C01	-6.22812	-3.61794
201530480006_R02C01	0.0644986	13.3108
201530480009_R08C01	-7.91631	-4.52635
201530480026_R02C01	5.36605	-10.7702
201530480027_R01C01	-6.17502	-4.3495
201530480041_R04C01	-2.50056	-2.19242
201530480041_R05C01	-2.51038	-2.27978
201530480041_R07C01	-2.49504	-2.268
201530480041_R08C01	-2.48642	-2.19386
201530480042_R03C01	-5.70013	-5.68551
201530480045_R02C01	-2.48783	-2.26179
201530480045_R03C01	-2.49076	-2.26485
201530480045_R04C01	-2.48563	-2.25963
201530480045_R05C01	-2.49512	-2.19908
201530490035_R02C01	-5.34428	-3.97928
201530490056_R01C01	-2.47885	-2.23435
201530490056_R02C01	-2.50304	-2.27076
201532190140_R07C01	-3.14556	0.62073
201532190206_R04C01	10.5715	-5.23534
201532190206_R08C01	-2.48428	-3.31811
201533480048_R03C01	-3.11135	-5.3909
201533480049_R02C01	-5.47204	-5.43698
201533480051_R06C01	4.53719	4.01833
201533490039_R02C01	-4.63904	-4.91646
201533490039_R03C01	-3.67766	-4.74114
201533490039_R04C01	-4.38638	-4.57368
201533490039_R05C01	-4.75324	-5.08595
201533490039_R06C01	-4.26729	-4.18052
201533490039_R07C01	-4.51767	-4.48334
201533490039_R08C01	-4.79102	-5.04287
201533490046_R01C01	-4.65723	-4.90886
201533490046_R02C01	-4.6474	-4.90105
201533490046_R03C01	2.87207	9.19255
201533490046_R04C01	-4.69049	-4.90029
201533490046_R05C01	-4.60273	-4.93038
201533490046_R06C01	-4.88547	-5.10549
201533490046_R07C01	-4.92282	-5.15665
201533490047_R02C01	-2.97487	-5.83026
201533490047_R07C01	2.41688	-11.3655
201533500009_R08C01	-4.65846	-5.02606
201533500013_R01C01	-4.83687	-5.13872
201533500013_R02C01	-4.73031	-4.96694
201533500013_R03C01	-4.66483	-4.90618
201533500013_R04C01	-4.87644	-5.23616
201533500013_R05C01	-4.89519	-5.21759
201533500013_R06C01	-4.88635	-5.24547
201533510024_R02C01	-2.359	-6.34554
201533510024_R06C01	-2.3613	-6.34792
201533510033_R03C01	-1.8034	5.87215
201858500066_R06C01	2.4129	-11.3637
201868500189_R01C01	7.78418	6.17614
201868500189_R02C01	8.61373	10.969
201868500189_R03C01	7.47711	5.96287
201868500189_R04C01	8.44228	10.7615
201868500189_R05C01	7.30573	5.49802
201868500189_R06C01	7.46647	5.70527
201868500189_R07C01	-6.60221	-11.4365
201868500189_R08C01	7.88267	5.6854
201868590106_R01C01	7.64873	6.26593
201868590106_R02C01	7.30235	5.49194
201868590106_R03C01	5.55135	6.25569
201868590106_R04C01	7.48224	5.21451
201868590106_R05C01	7.48072	5.38618
201868590106_R06C01	5.97417	6.08765
201868590106_R07C01	7.09472	5.8463
201868590106_R08C01	8.10911	10.7072
201868590252_R01C01	6.80415	5.82286
201869680016_R05C01	-2.97304	-5.82732
201869680051_R08C01	8.75818	11.0876
201869680162_R01C01	6.71017	6.27751
201869680162_R02C01	5.50925	5.94255
201869680162_R06C01	8.0876	10.0634
201869680162_R07C01	7.20513	5.50288
201869680182_R07C01	-2.34414	-6.36146
201869680190_R01C01	-1.9222	-5.62387
201869680196_R01C01	-4.40591	-3.15737
201869680197_R04C01	-6.52905	-5.0422
201869680197_R05C01	8.1189	-6.8795
201869680197_R06C01	8.10669	-6.86461
201869680197_R07C01	8.10363	-6.86477
201869680197_R08C01	8.10721	-6.86648
201869690097_R04C01	-3.89913	-0.279892
201869690097_R05C01	-3.7349	-0.208857
201869690097_R06C01	-2.61582	-1.23446
201869690142_R08C01	6.32289	6.06805
201869690168_R01C01	8.10638	-6.86571
201869690168_R04C01	-4.67321	-4.54448
201869690168_R06C01	-4.8937	-4.83745
201869690168_R07C01	8.10606	-6.86564
201869690168_R08C01	8.10724	-6.86385
201869690203_R03C01	8.10485	-6.86355
201869690203_R06C01	8.10633	-6.86574
201869690203_R07C01	-6.54115	-5.05228
201869690203_R08C01	-6.5783	-4.9823
201869690205_R02C01	-6.53554	-5.04486
201869690205_R03C01	8.1079	-6.86572
201869690205_R05C01	-6.51586	-5.02404
201869690205_R06C01	-6.4973	-5.02599
201869690205_R08C01	-6.51702	-5.03743
201870610040_R03C01	8.10735	-6.86626
201870610040_R04C01	8.10393	-6.86308
201870610040_R05C01	-6.53387	-5.05735
201870610040_R06C01	-6.48625	-5.01475
201870610040_R08C01	-6.51868	-5.03917
201870610041_R02C01	-6.46166	-5.00068
201870610041_R08C01	-6.51336	-5.04182
201870610042_R01C01	-6.53972	-5.05783
201870610042_R04C01	-6.46079	-4.98786
201870610042_R07C01	-6.52291	-5.04599
201870610042_R08C01	-6.53413	-5.04941
201870610180_R02C01	2.76158	2.37119
201870610180_R03C01	6.85954	5.63507
201870610180_R04C01	-3.90689	-3.73684
201870610180_R05C01	6.94427	5.56773
201870610180_R06C01	5.70785	5.57766
201870610180_R07C01	5.70912	6.18686
201870610180_R08C01	-2.4826	-1.52366
201870620016_R02C01	-6.54137	-5.06141
201870620016_R03C01	-6.44057	-4.98454
201870620016_R04C01	-6.53475	-5.04407
201870620016_R05C01	-6.50053	-5.03076
201870620016_R06C01	-6.46231	-4.99321
201870620017_R01C01	8.10671	-6.86618
201870620017_R02C01	-6.52941	-5.04717
201870620017_R03C01	-6.53168	-5.04773
201870620017_R04C01	-6.50538	-5.03078
201870620067_R01C01	-4.44236	-3.04939
201870620067_R02C01	-0.833595	-3.66571
201876940058_R01C01	8.04976	10.4974
201876940058_R02C01	-6.68507	-2.78684
201876940058_R03C01	5.92799	-5.68849
201876940067_R08C01	-3.68892	-0.176919
201876940193_R06C01	-11.3258	4.8561
201876940193_R07C01	-11.3278	4.85469
201876940193_R08C01	-11.3255	4.85597
201876940196_R01C01	-11.3265	4.85533
201876940196_R02C01	-3.95992	-4.86113
201876940196_R03C01	-11.3295	4.85331
201876940196_R04C01	-4.68207	-4.50793
201876940196_R05C01	-4.80042	-4.75154
201876940196_R06C01	-4.7132	-4.78931
201876940196_R07C01	-4.6908	-4.14095
201876940196_R08C01	-4.91793	-5.14016
201876940197_R01C01	-4.9997	-5.04412
201876940197_R02C01	-4.89074	-5.07844
201876940197_R03C01	-4.92181	-5.10599
201876940198_R01C01	-4.24983	-4.17588
201876940199_R04C01	-4.44361	-3.07221
201876940199_R05C01	-4.45268	-3.0875
201876940199_R06C01	-4.4386	-3.06248
201876940215_R06C01	-5.66598	-5.64527
201904410003_R01C01	-4.73048	-4.84643
201904410003_R02C01	-4.70403	-4.91642
201904410003_R03C01	-4.70703	-4.91941
201904410003_R04C01	-4.72089	-4.82213
201904410003_R05C01	-4.72651	-4.85032
201904410003_R06C01	-4.73184	-4.85912
201904410003_R07C01	-4.73483	-4.87553
201904410003_R08C01	-4.7689	-4.87797
201904410004_R01C01	-4.71149	-4.89841
201904410004_R02C01	-4.7382	-4.7349
201904410004_R03C01	-4.72431	-4.50902
201904410004_R04C01	-4.71053	-4.82104
201904410004_R05C01	-4.72881	-4.8669
201904410004_R06C01	-4.71426	-4.86346
201904410004_R07C01	-3.96398	-4.05287
201904410004_R08C01	-4.04772	-3.77956
201904410005_R01C01	-4.0183	-3.79648
201904410005_R02C01	-4.09482	-3.69542
201904410005_R03C01	-3.99255	-3.99526
201904410005_R04C01	-3.94232	-3.76766
201904410005_R05C01	-3.92133	-4.52414
201904410005_R06C01	-4.09739	-4.07449
201904410005_R07C01	-4.06442	-3.80869
201904410005_R08C01	-3.84319	-4.25237
201904410006_R01C01	-3.94191	-3.93167
201904410006_R02C01	-4.2174	-4.23112
201904410006_R03C01	-4.14315	-3.44021
201904410006_R04C01	-3.93124	-3.81343
201904410006_R05C01	-4.01736	-3.4238
201904410006_R06C01	-4.6071	-4.84906
201904410006_R07C01	-4.71614	-4.7848
201904410006_R08C01	-4.72673	-4.76107
201904410007_R01C01	-4.72207	-4.88583
201904410007_R02C01	-4.71879	-4.7818
201904410007_R03C01	-4.74907	-4.83003
201904410007_R04C01	-4.7423	-4.82216
201904410007_R05C01	-4.76389	-4.83032
201904410007_R06C01	-4.75027	-4.80324
201904410007_R07C01	-5.8543	-4.05737
201904410007_R08C01	-5.90445	-4.08841
201904410008_R01C01	-5.86372	-4.0625
201904410008_R02C01	-5.89561	-4.06963
201904410008_R03C01	-5.85006	-4.05797
201904410008_R04C01	-5.83945	-4.03537
201904410008_R05C01	-5.86663	-4.05831
201904410008_R06C01	-5.86527	-4.04354
201904410016_R05C01	5.36447	-10.7713
201904640101_R05C01	-3.52625	-5.75884
201904640134_R03C01	-5.18805	-4.0408
201904640134_R04C01	-3.50073	-5.73638
201904640134_R06C01	-3.4456	-5.70795
201904640134_R07C01	-3.51861	-5.76185
201904650006_R03C01	-3.51436	-5.74709
201904650006_R05C01	-3.53349	-5.76758
201904650006_R06C01	-3.5224	-5.76409
201904650072_R01C01	-2.37538	-6.33366
201904660103_R05C01	2.46602	2.28115
201904660103_R06C01	2.41093	2.25667
201904660103_R07C01	2.43362	2.26181
201904660103_R08C01	2.45434	2.26993
201904660108_R01C01	2.44762	2.26375
201904660108_R02C01	2.4052	2.23633
201904660108_R03C01	2.43593	2.25017
201904660108_R04C01	2.4689	2.23667
201904660108_R05C01	2.54755	2.21682
201904660108_R06C01	2.41125	2.26541
201904660108_R07C01	2.43638	2.2587
201904660176_R01C01	8.10748	-6.86451
201959740065_R01C01	-5.03229	-3.87522
201959740066_R08C01	-4.43298	-3.05265
201959740071_R01C01	-4.44704	-3.19607
201959740071_R02C01	-4.43175	-3.08152
201959740071_R03C01	-4.44809	-3.06756
201959740071_R04C01	-4.43236	-3.24506
201959740071_R05C01	-4.43562	-3.06236
201959740071_R06C01	-4.43926	-3.06437
201959740071_R07C01	-4.43855	-3.05767
201959740071_R08C01	-4.48855	-3.24853
201959740085_R01C01	-4.44067	-3.04311
201959740085_R02C01	-4.4339	-3.25566
201959740085_R03C01	-4.43946	-3.0436
201959740085_R04C01	-4.43576	-3.09545
201959740085_R05C01	-4.42322	-3.22756
201959740085_R06C01	-4.4363	-3.03813
201959740085_R08C01	-4.44653	-3.12667
201959740093_R01C01	-4.44042	-3.08202
201959740093_R02C01	-4.43404	-3.06786
201959740093_R04C01	-4.45939	-3.16529
201959740093_R06C01	-4.4413	-3.1043
201959740093_R07C01	-4.44847	-3.0915
201959740093_R08C01	-4.45257	-3.2037
201959740118_R01C01	-4.49598	-3.20974
201959740118_R03C01	-4.40263	-3.17506
201959740118_R05C01	-4.40507	-3.16433
201959740189_R02C01	-4.44733	-3.10183
201959740189_R04C01	-4.41963	-3.04231
201959740245_R04C01	5.38976	-10.796
201959750142_R08C01	-7.91401	-4.51008
202053820043_R01C01	-3.20749	1.23361
202053820043_R02C01	10.3738	-5.09729
202053820043_R03C01	7.36475	5.25881
202053820043_R04C01	-3.18547	0.879881
202053820043_R05C01	-3.91295	1.96318
202053820043_R06C01	-6.95289	-11.1543
202053820043_R07C01	8.15514	6.52675
202053820043_R08C01	4.70568	6.55221
202053820135_R06C01	7.54153	5.60203
202053820135_R07C01	7.13441	5.55874
202053820135_R08C01	9.08479	-0.769333
202053820140_R01C01	3.75277	-3.7343
202053820140_R02C01	21.0784	-0.374467
202053820140_R03C01	5.88446	6.17954
202053820140_R04C01	3.64428	-5.54519
202053820140_R05C01	-6.67508	-11.3436
202053820162_R01C01	0.669956	-3.74774
202053820162_R02C01	-2.6005	1.36167
202053820162_R03C01	5.83712	7.37595
202053820162_R04C01	5.83945	7.37501
202053820162_R05C01	7.94839	6.26647
202053820162_R06C01	-1.93853	6.04865
202053820162_R07C01	10.2918	-5.28006
202053820162_R08C01	7.47585	6.77661
202060330022_R02C01	-3.86882	-0.0353517
202060330022_R03C01	-2.6047	-0.470108
202060330022_R04C01	-3.53065	-2.73991
202060330022_R05C01	-6.71727	-11.065
202060330063_R07C01	-3.70004	-0.140182
202060330084_R05C01	-6.71919	-10.657
202060330084_R06C01	-1.91335	6.02941
202060330084_R07C01	-7.03779	-10.5671
202060330097_R04C01	-5.16362	-4.10598
202060330097_R05C01	13.653	-2.42237
202060330097_R06C01	3.80196	-3.76803
202060330097_R07C01	3.8337	-3.79663
202060330097_R08C01	2.45167	2.09209
202060330099_R01C01	-0.728902	2.51929
202060330104_R01C01	-7.50438	6.09398
202060330104_R02C01	-7.46502	6.05535
202060330104_R03C01	-6.5625	6.56805
202060330104_R04C01	-6.53496	6.58489
202060330104_R05C01	-6.53748	6.58679
202060330104_R06C01	-6.55518	6.539
202060330104_R07C01	-6.57567	6.58088
202060330104_R08C01	-6.48132	6.6938
202060330139_R01C01	11.2173	-5.46178
202060330139_R02C01	-1.93513	6.05173
202060330139_R03C01	5.40308	6.15589
202060330139_R04C01	3.65779	-5.53968
202060330139_R05C01	-1.98114	6.08939
202060330139_R06C01	-6.56625	-10.5787
202060330139_R07C01	-1.92316	5.99509
202060330139_R08C01	8.16476	11.5653
202060330149_R01C01	11.2135	-5.45814
202060330149_R02C01	7.78433	5.74652
202060330149_R03C01	-1.91305	0.785254
202060330149_R04C01	3.60894	-5.5394
202060330149_R05C01	-2.5579	1.42281
202060330149_R06C01	-1.8961	6.03235
202060330149_R07C01	5.8375	6.13876
202060330149_R08C01	-6.11295	-11.6046
202060330168_R01C01	11.2073	-5.45693
202060330168_R02C01	0.0630893	-3.81832
202060330168_R03C01	8.73517	11.4209
202060330168_R04C01	7.91722	6.08796
202060330168_R05C01	7.39021	5.66374
202060330168_R06C01	8.06865	10.0734
202060330168_R07C01	7.65048	6.21277
202060330168_R08C01	-6.11428	-11.6432
202066270121_R01C01	-3.6257	1.46179
202066270121_R02C01	11.1443	-5.40877
202066270121_R03C01	-5.23282	-4.1424
202066270121_R04C01	-1.87507	5.94976
202066270121_R05C01	-1.87791	5.945
202066270121_R06C01	-2.92083	-0.184741
202066270121_R07C01	3.76985	-3.78515
202066270121_R08C01	-3.51871	1.47807
202066270123_R01C01	-3.59643	1.51822
202066270123_R02C01	-3.45259	1.21544
202066270123_R03C01	-3.35296	1.30338
202066270123_R04C01	-3.43222	1.05469
202066270141_R06C01	8.06696	10.7027
202066270141_R07C01	5.55949	5.70701
202066270141_R08C01	-6.38475	-10.6564
202066270148_R01C01	-3.18106	1.68624
202066270148_R02C01	-3.59281	1.54928
202066270148_R03C01	-3.8691	2.02341
202066270148_R04C01	-3.48786	1.37316
202073190042_R06C01	4.54725	4.03015
202073190048_R04C01	-3.73439	-4.65695
202073190048_R06C01	-3.9255	-4.68491
202073190097_R02C01	0.126448	13.3566
202073190098_R04C01	2.4073	-11.3651
202073190098_R05C01	-5.49589	-3.42457
202073190098_R06C01	-5.07753	-3.76245
202073190098_R08C01	5.38109	-10.7561
202073190099_R01C01	-4.6163	-3.87279
202073190099_R06C01	-5.71917	-2.94553
202073190099_R07C01	-5.10012	-3.55109
202073190099_R08C01	-4.86318	-3.70151
202073190100_R01C01	-5.35097	-3.98858
202073190100_R02C01	-3.94953	-3.44491
202073190100_R03C01	-4.00966	-4.07148
202073190100_R07C01	-4.6568	-3.85548
202073190101_R05C01	-5.46169	-3.2967
202073190101_R06C01	5.36314	-10.7684
202073190102_R02C01	-3.59884	-4.71683
202073190102_R03C01	-4.76303	-4.00035
202073190102_R04C01	-5.10345	-4.01267
202073190106_R02C01	-11.4094	2.0822
202073190109_R02C01	-3.91076	-3.87102
202073190109_R07C01	-4.23715	-4.26588
202073190110_R04C01	-3.94486	-4.26518
202073190111_R07C01	-4.44251	-3.0875
202073190111_R08C01	-5.47569	-3.1802
202073190116_R04C01	-11.4104	2.08297
202073190116_R05C01	-5.69785	-5.6876
202073190117_R07C01	5.37533	-10.7614
202073190120_R01C01	-3.91273	-4.53253
202073190120_R05C01	-4.38798	-4.2855
202073220044_R04C01	-4.30658	-4.28424
202073220045_R02C01	-4.43975	-4.24681
202073220045_R05C01	-4.54262	-3.53227
202073220045_R08C01	-4.20251	-4.93464
202073220047_R02C01	-5.5023	-3.34335
202073220047_R03C01	-4.17929	-4.07788
202073220047_R04C01	-4.00667	-3.74787
202073220047_R07C01	-2.761	-3.25245
202073220048_R01C01	-5.48636	-3.15439
202081120002_R01C01	7.79254	5.69204
202081120002_R02C01	-1.75317	5.89553
202081120002_R03C01	6.35457	6.06778
202081120002_R04C01	-6.07863	-11.6014
202081120002_R05C01	-3.95924	-3.71833
202081120002_R06C01	6.11384	6.28547
202081120002_R07C01	-6.11044	-11.5398
202081120002_R08C01	6.81018	5.61333
202081120016_R01C01	8.0424	11.5281
202081120016_R02C01	-5.17834	-3.91999
202081120016_R03C01	-2.13609	-1.66649
202081120016_R04C01	7.92239	6.38844
202081120016_R05C01	8.01609	10.7631
202081120016_R06C01	3.87257	-3.84001
202081120020_R01C01	11.1827	-5.43269
202081120020_R02C01	-5.22462	-4.40668
202081120020_R03C01	8.14123	11.0777
202081120020_R04C01	-1.92327	6.02245
202081120020_R05C01	-3.62451	-0.306114
202081120020_R06C01	-6.07912	-11.5037
202081120020_R07C01	-6.45178	-11.4294
202081120020_R08C01	-1.93935	6.01888
202081120037_R01C01	-6.71612	6.76184
202081120037_R02C01	-6.66915	6.74349
202081120153_R05C01	8.76471	11.4968
202081120153_R06C01	-3.0133	0.490676
202081120153_R07C01	-6.13054	-11.5233
202081120153_R08C01	6.38749	5.35595
202081120236_R01C01	7.84225	6.3932
202081120236_R02C01	-3.38574	1.21735
202081120236_R03C01	-3.20831	0.795401
202081120236_R04C01	-3.69137	1.60474
202081120236_R05C01	3.81448	-3.73244
202081120236_R06C01	-3.19718	0.641625
202081120236_R07C01	-3.77309	1.92691
202081120236_R08C01	3.81445	-3.75938
202081130007_R01C01	-6.57889	6.61993
202081130007_R02C01	-6.52392	6.54129
202081130007_R03C01	-6.55014	6.56711
202081130007_R04C01	-6.55238	6.54523
202081130007_R05C01	7.41238	5.35961
202081130007_R06C01	8.0816	11.6016
202081130007_R07C01	5.70889	6.32225
202081130007_R08C01	-2.80247	-0.0780715
202081130143_R07C01	3.65275	-5.54096
202081130143_R08C01	3.65158	-5.54291
202081130200_R01C01	-6.52929	-10.5163
202081130200_R02C01	-1.18669	2.04901
202081130200_R03C01	-7.07892	-10.4933
202081130200_R04C01	-6.86659	-11.1774
202081130200_R05C01	-3.51622	1.24877
202081130200_R06C01	-3.62625	1.47107
202081130200_R07C01	-3.43231	1.20847
202081130200_R08C01	-3.22783	0.847532
202081130230_R01C01	-6.62922	-10.4716
202081130230_R02C01	-6.29312	-10.8156
202081130230_R03C01	6.29594	6.03743
202081130230_R04C01	-6.58667	-10.4997
202081130230_R05C01	-6.20516	-11.2112
202081130230_R06C01	6.28788	5.25221
202081130230_R07C01	-8.0942	0.12567
202081130230_R08C01	7.43167	5.99029
202091360008_R08C01	8.93356	11.2638
202093110109_R07C01	-3.20064	-5.4003
202110250007_R01C01	10.3282	-2.98477
202110250007_R02C01	-3.50369	-9.94998
202110250007_R03C01	5.82962	7.34256
202110250007_R04C01	-2.67625	-1.02424
202110250007_R05C01	6.61704	5.80497
202110250007_R06C01	-1.85125	5.94202
202110250007_R07C01	-2.52368	-0.813468
202110250007_R08C01	6.20875	6.30776
202110250017_R01C01	-2.10496	5.81145
202110250017_R02C01	11.1617	-5.43106
202110250017_R03C01	-6.11642	-11.5865
202110250017_R04C01	-2.39998	-1.56926
202110250017_R05C01	2.73045	13.0313
202110250017_R06C01	-5.16387	-2.61436
202110250017_R07C01	2.57339	1.97864
202110250017_R08C01	-6.61098	-2.82911
202110250049_R01C01	8.51348	10.9213
202123800071_R01C01	2.64613	13.2179
202123800071_R02C01	11.9625	1.69914
202123800071_R03C01	-6.94182	-11.2424
202123800071_R04C01	-6.72485	-11.0614
202123800071_R05C01	2.85987	9.17152
202123800071_R06C01	7.53141	5.6202
202123800071_R07C01	-6.16878	-0.514675
202123800112_R01C01	-1.66395	5.77365
202123800112_R02C01	-1.84314	5.92955
202123800112_R03C01	-1.88558	5.98098
202123800112_R04C01	-1.83973	6.00655
202123800112_R05C01	3.88091	-3.82825
202123800112_R06C01	-3.71772	-5.58122
202123800112_R07C01	-3.51868	-5.74145
202123800112_R08C01	-4.04537	-3.62394
202123800120_R01C01	-4.20866	-3.39138
202123800120_R02C01	3.79995	-3.76516
202123800120_R03C01	3.84222	-3.80908
202123800120_R04C01	3.80423	-3.76906
202123800120_R05C01	2.54338	2.01066
202123800120_R06C01	3.84302	-3.80865
202123800120_R07C01	-7.12561	-10.6137
202123800120_R08C01	6.18058	6.33745
202123800186_R04C01	3.79483	-3.75464
202123800186_R05C01	3.8031	-3.76772
202123800186_R06C01	-1.75301	5.8349
202123800186_R07C01	-3.88871	-0.300477
202123800186_R08C01	-6.5498	-10.4995
202123800244_R01C01	-1.9594	-1.6044
202123800244_R02C01	10.4165	-5.25288
202123800267_R01C01	-6.19067	-11.1388
202123800267_R02C01	2.5893	2.07651
202123800267_R03C01	7.47008	5.57854
202123800267_R04C01	-4.75765	-4.78005
202123800275_R05C01	6.36452	6.64433
202123800275_R06C01	11.2193	-5.46715
202123800275_R07C01	11.247	-5.48455
202123800275_R08C01	3.08111	2.62043
202123800280_R01C01	-1.66875	2.01572
202128330001_R01C01	-6.10402	-11.4724
202128330001_R02C01	-2.16392	-1.1534
202128330002_R01C01	-7.71724	6.12409
202128330002_R02C01	-7.47723	6.30748
202128330002_R03C01	-7.31796	6.03023
202128330002_R04C01	-7.58301	6.08665
202128330002_R05C01	-7.57979	6.1284
202128330002_R06C01	-7.22911	6.18835
202128330002_R07C01	-7.33942	6.30371
202128330002_R08C01	-7.15182	6.06801
202128330004_R01C01	6.188	6.28253
202128330004_R02C01	2.87304	9.19254
202128330004_R03C01	7.81074	5.49752
202128330004_R04C01	8.04289	6.36685
202128330004_R05C01	11.1599	3.38463
202128330004_R06C01	-5.1604	-4.02971
202128330004_R07C01	6.90896	5.69554
202128330004_R08C01	-1.84845	5.95086
202128330011_R01C01	5.76412	6.39235
202128330088_R04C01	10.6612	-5.23437
202128330088_R05C01	8.10616	10.0802
202128330088_R06C01	7.28974	5.54243
202128330088_R07C01	-1.8569	5.94531
202128330088_R08C01	-1.88755	5.98601
202128330089_R01C01	-6.62984	-10.5069
202128330089_R02C01	-6.75823	-10.5288
202128330089_R03C01	-6.61706	-10.6204
202128330089_R04C01	-6.62501	-10.4926
202128330089_R05C01	-5.35025	-4.14638
202128330089_R06C01	7.78866	5.32892
202128330089_R07C01	7.93992	6.16422
202128330089_R08C01	-6.10892	-11.4798
202128330100_R01C01	6.72135	5.53668
202128330100_R02C01	-3.55541	-0.294664
202128330100_R03C01	-0.768225	-0.415494
202128330100_R04C01	6.82042	5.75551
202128330100_R05C01	6.7354	5.64219
202128330100_R06C01	-6.55193	-10.5682
202128330100_R07C01	8.08136	11.6445
202128330100_R08C01	2.65756	-8.99362
202128330225_R06C01	-5.68658	-5.67653
202128330246_R03C01	-2.39133	-6.31431
202135260046_R06C01	6.53555	5.50721
202135260046_R07C01	8.21996	11.3062
202135260046_R08C01	-5.211	-4.58979
202135260076_R01C01	-6.8053	-11.3388
202135260076_R02C01	8.12811	6.52487
202135260076_R03C01	6.33342	6.11288
202135260076_R04C01	7.51551	5.0648
202135260076_R05C01	8.26441	11.4935
202135260076_R06C01	-6.12422	-11.5938
202135260076_R07C01	-6.11025	-11.5659
202135260076_R08C01	7.60577	5.32474
202148010086_R02C01	-5.12412	-4.29227
202148010086_R03C01	-2.93913	-3.50955
202148010086_R04C01	-4.00878	-4.32057
202148010086_R08C01	-5.38639	-3.49189
202148010087_R01C01	-5.68321	-5.65553
202148010088_R06C01	-4.00074	-4.60168
202148010088_R08C01	-3.99631	-4.29024
202148010089_R01C01	-1.66328	5.79554
202148010089_R05C01	-3.83673	-4.11343
202148010089_R08C01	-5.44121	-3.21699
202148010090_R04C01	-6.19057	-3.12342
202148010090_R05C01	-5.7507	-3.28471
202163110004_R04C01	-3.96314	-4.29734
202163110004_R05C01	-3.59893	-4.68322
202163110068_R07C01	-6.22068	-3.62969
202163110073_R01C01	-6.21731	-3.63403
202163110073_R05C01	-6.2373	-3.62571
202163110073_R07C01	-4.15259	-4.98996
202163110076_R01C01	-6.20292	-3.6127
202163110076_R03C01	-6.21835	-3.63862
202163110076_R05C01	-6.22778	-3.6499
202163110076_R07C01	-6.23763	-3.58017
202163110076_R08C01	-6.20748	-3.6391
202163110077_R07C01	-6.2274	-3.3717
202163110082_R01C01	-6.23806	-3.35754
202163110082_R03C01	-6.22175	-3.35556
202163110082_R04C01	-6.22237	-3.3464
202163110082_R05C01	-6.22853	-3.3911
202163110082_R06C01	-6.21686	-3.35375
202163110082_R07C01	-6.27734	-3.30486
202163530140_R07C01	-4.14376	-4.27467
202172220188_R07C01	-5.36823	-3.98408
202176290055_R05C01	-5.67682	-5.66945
202176290120_R05C01	-2.35663	-6.34947
202176290151_R05C01	-3.53634	-5.77637
202176290151_R07C01	-3.92931	-4.57387
202176290151_R08C01	2.73335	-9.08952
202176290155_R01C01	-2.35496	-6.34991
202176290155_R03C01	-5.67309	-5.65916
202176290155_R04C01	-5.68069	-5.667
202176290155_R05C01	-2.35356	-6.3549
202178770016_R06C01	2.409	-11.3636
202178770020_R08C01	-6.50054	-5.01975
202178770094_R05C01	-3.72052	-4.69028
202184990145_R05C01	-7.90769	-4.51114
202232290177_R03C01	-3.13133	-5.3801
202232290177_R05C01	-3.13857	-5.37723
202232290177_R06C01	-3.14611	-5.37829
202232290177_R07C01	-3.16814	-5.39689
202232290190_R01C01	-3.14174	-5.36119
202232290190_R07C01	-3.14371	-5.36277
202234390038_R01C01	-4.61263	-4.43969
202234390081_R04C01	-4.37216	-4.20105
202234390081_R07C01	-4.36667	-4.17745
202250790160_R03C01	2.83206	-9.16674
202250800101_R03C01	0.131219	13.3653
202250800101_R06C01	-5.58995	-5.58118
202250800134_R08C01	-4.93002	-4.42168
202250800142_R05C01	-5.18122	-3.29963
202250800155_R06C01	-5.75502	-5.73907
202250800169_R03C01	-5.33841	-3.34041
202250800169_R06C01	-4.08447	-4.54707
202250800169_R07C01	-3.6849	-4.61488
202250800169_R08C01	-5.66677	-5.67554
202250800170_R01C01	-5.58626	-5.56261
202250800170_R03C01	-5.09381	-3.88607
202250800170_R05C01	-5.02892	-3.75654
202250800170_R07C01	-5.3158	-3.99219
202250800171_R01C01	-4.03236	-3.72732
202250800171_R05C01	-5.15503	-4.08709
202250800171_R06C01	-3.43046	-5.58187
202250800176_R01C01	5.37802	-10.7616
202250800176_R03C01	-5.11642	-4.07501
202250800181_R04C01	2.43082	-11.3821
202250800181_R07C01	-5.46738	-3.11165
202259340130_R02C01	-2.35744	-6.34628
202259340130_R04C01	-5.76999	-5.75318
202259340130_R06C01	-3.8046	-4.75893
202259340130_R07C01	-4.02972	-3.96651
202259340130_R08C01	-2.87691	-5.92867
202259340132_R01C01	-4.87508	-5.08062
202259350090_R01C01	-3.61269	-4.673
202259350090_R08C01	5.37607	-10.7615
202259350187_R08C01	-4.19324	-4.94183
202259350188_R08C01	0.0893571	13.3324
202273260014_R03C01	-2.98524	-5.8369
202279130003_R02C01	0.0716111	13.3204
202279130003_R06C01	0.213111	13.3959
202279130017_R01C01	-0.80547	-3.69187
202279130017_R02C01	-5.06267	-4.24978
202279130017_R06C01	-5.52924	-5.49719
202279130019_R01C01	-4.15591	-3.94713
202279130019_R06C01	-4.44714	-3.15226
202279130019_R08C01	-3.79365	-4.56909
202279130032_R08C01	-2.38824	-6.32198
202292310003_R04C01	-5.72071	-5.70745
202292310026_R07C01	-5.67149	-5.69005
202292310027_R02C01	-5.47195	-3.1807
202292310027_R06C01	-6.38651	-4.95036
202292310034_R02C01	-4.04064	-4.62335
202292310034_R05C01	-2.85113	-5.99058
202292310034_R06C01	-5.11883	-4.16594
202292310052_R07C01	2.40489	-11.3599
202292310052_R08C01	-5.61837	-5.55161
202292310053_R01C01	-3.61325	-4.71755
202292310056_R01C01	-0.722406	-3.72781
202292310056_R03C01	-6.1233	-3.65364
202292310098_R05C01	0.0735137	13.3244
202292310098_R08C01	-4.39093	-4.31391
202292310112_R06C01	-4.8806	-3.84197
202292310113_R02C01	-3.8509	-4.64612
202292310113_R03C01	-3.50363	-5.69663
202292310113_R04C01	-3.96613	-4.88577
202292310113_R06C01	-5.7663	-5.74836
202292310113_R07C01	-5.63444	-5.62641
202292320010_R04C01	-5.54607	-3.69705
202292320010_R05C01	-5.4145	-3.31646
202292320011_R03C01	-4.6776	-4.26736
202292320011_R05C01	-5.68535	-2.96914
202292320012_R01C01	-3.61122	-4.73818
202292320012_R06C01	-4.28016	-3.37714
202292320013_R05C01	-5.43027	-3.19582
202292320014_R03C01	-6.36502	-4.95228
202292320017_R07C01	-4.53762	-4.62892
202292320021_R03C01	-5.65261	-5.64278
202292320021_R04C01	-3.81193	-4.67537
202292320022_R01C01	5.37582	-10.7613
202292320022_R04C01	-4.47638	-3.93304
202292320022_R08C01	-3.47909	-5.71287
202292320023_R07C01	-5.65573	-5.66344
202292320025_R02C01	-3.9351	-3.83258
202292320027_R06C01	2.4103	-11.362
202292320028_R02C01	2.41616	-11.3652
202292320029_R08C01	5.38394	-10.7534
202292320030_R07C01	-5.67712	-5.6713
202292320033_R07C01	-5.04899	-4.24526
202292320034_R06C01	-4.19742	-4.25199
202292320034_R07C01	-4.87437	-3.92403
202292320035_R03C01	-5.13167	-4.11613
202292320035_R04C01	-3.67499	-4.70597
202292320035_R07C01	-3.64641	-4.68569
202292320036_R05C01	-11.3732	2.04834
202292320036_R07C01	5.37198	-10.7663
202292320054_R06C01	-5.57112	-4.23681
202292320054_R07C01	-5.5194	-4.1761
202292320054_R08C01	-5.54573	-4.17812
202292320060_R08C01	0.0847842	13.3323
202292320061_R03C01	-5.38786	-4.00014
202292320061_R04C01	-2.84768	-5.99657
202292320061_R06C01	-2.34245	-6.36245
202292320086_R03C01	-3.86348	-4.67192
202292320086_R05C01	-0.795968	-3.70364
202292320086_R06C01	-5.18395	-4.60504
202292320087_R04C01	-5.54719	-3.45981
202292320088_R08C01	-3.98692	-3.82532
202292320090_R02C01	-3.97481	-4.87263
202292320097_R05C01	-2.34666	-6.35733
202292320097_R06C01	-4.22452	-4.28682
202292320098_R05C01	-5.55808	-4.14489
202292320098_R06C01	-5.55514	-4.20907
202292320098_R07C01	-5.50989	-4.18928
202292320098_R08C01	-5.5569	-4.20034
202292320100_R07C01	-5.58107	-4.19456
202292320100_R08C01	-5.54369	-4.19601
202292320101_R01C01	-5.57665	-4.18648
202292320101_R02C01	-5.54692	-4.18164
202292330043_R04C01	-2.52213	-3.25301
202292330070_R01C01	-2.52329	-3.27523
202292330070_R02C01	-2.44626	-3.49268
202292330070_R03C01	-2.84231	-1.48079
202292330070_R07C01	-2.58988	-3.21599
202292330070_R08C01	-2.48873	-3.3243
202702230016_R02C01	-2.74302	-3.10914
202760950086_R01C01	0.38262	13.4724
202761400067_R01C01	-4.05705	-4.53791
202761400067_R02C01	-3.69912	-4.69779
202764140098_R01C01	-3.61031	-4.66929
202787550065_R06C01	-3.79987	0.0922764
202790040015_R03C01	-3.74741	0.110055
202790040015_R04C01	-4.17752	0.324062
202790040026_R06C01	-3.68504	-0.0192755
202818860156_R07C01	-2.37268	-6.33532
202822930036_R05C01	-2.86389	-5.97952
202822930047_R04C01	-2.4034	-6.30677
202822930129_R07C01	-5.23894	-4.20055
202884930025_R01C01	6.65294	5.80043
202884930025_R02C01	6.50418	5.51392
202884930025_R03C01	-3.53351	-9.98126
202884930025_R04C01	2.73662	2.26547
202884930025_R05C01	-6.687	-10.468
202884930025_R06C01	-6.56874	-10.5114
202884930025_R07C01	-4.02772	-3.49432
202884930025_R08C01	2.54034	2.24373
202884930027_R01C01	6.5371	5.84865
202884930027_R02C01	-5.2125	-4.56104
202884930027_R03C01	6.74109	5.60862
202884930027_R04C01	-1.9351	6.04284
202884930027_R05C01	10.0157	-0.0121788
202884930027_R06C01	7.82374	5.35113
202884930027_R07C01	-6.03022	-11.5505
202884930027_R08C01	-6.63949	-10.4658
202884930034_R01C01	10.4399	-5.22208
202884930034_R02C01	11.2025	-5.45267
202905580154_R06C01	-6.67846	-10.5191
202905580154_R07C01	-1.90147	6.00772
202905580154_R08C01	-1.65867	5.74451
202908540036_R01C01	6.3236	6.04661
202908540036_R02C01	-6.36616	-10.8353
202908540036_R03C01	-3.79927	1.7932
202908540036_R04C01	11.2038	-5.44689
202908540036_R05C01	-6.56381	-10.763
202908540036_R06C01	10.3601	-5.24238
202908540036_R07C01	-6.80026	-11.1632
202908540036_R08C01	-6.05643	-11.5511
202908540110_R06C01	-7.9181	-0.456798
202908540110_R07C01	7.14664	5.69341
202908540110_R08C01	11.1581	3.38773
202908540168_R06C01	-7.08364	-10.4861
202908540168_R07C01	2.75131	2.44904
202908540168_R08C01	-0.64006	2.69635
202908540174_R01C01	8.14266	10.1625
202908540174_R02C01	7.33941	6.54319
202908540174_R03C01	-1.89596	-0.348711
202908540174_R04C01	-6.50215	-5.03482
202908540174_R05C01	-6.11533	-11.6435
202908540174_R06C01	-6.54277	-10.7856
202908540174_R07C01	-4.90664	-5.15575
202908540174_R08C01	-1.87149	5.96781
202908540176_R08C01	-3.32835	1.05511
202908540184_R05C01	-3.87726	2.04604
202908540184_R06C01	-3.4984	1.24648
202908540184_R07C01	-3.46711	1.34499
202908540188_R01C01	-6.68506	-10.408
202908540188_R02C01	-2.48241	-1.14953
202908540188_R04C01	-3.79527	1.79928
202908540188_R05C01	-3.55756	1.49959
202908540188_R06C01	-3.57988	1.63641
202908540188_R07C01	-3.07439	2.09445
202908540188_R08C01	-3.68437	1.56478
202908540201_R01C01	-7.12223	-11.3891
202908540201_R02C01	10.4435	-5.19825
202908540201_R03C01	5.31635	-0.317627
202908540201_R04C01	-3.76712	0.0672784
202908540201_R05C01	8.07604	6.53532
202908540201_R06C01	-2.52698	-0.706031
202908540201_R07C01	-6.52933	-10.5641
202908540201_R08C01	8.14419	6.53586
202908540207_R01C01	8.12098	10.3164
202908540207_R02C01	3.81028	-3.78207
202908540207_R03C01	3.84528	-3.80157
202908540207_R04C01	3.77789	-3.75538
202908540207_R05C01	3.78787	-3.76016
202908540207_R06C01	3.80486	-3.77805
202908540207_R07C01	3.81798	-3.79043
202908540207_R08C01	3.86307	-3.81979
202908540257_R01C01	8.15042	6.52959
202908540257_R02C01	6.42607	6.63202
202908540257_R03C01	-6.5221	-10.542
202908540257_R04C01	-1.87583	5.98817
202908540257_R05C01	10.3152	-5.26665
202908540257_R06C01	6.31234	0.61154
202908540257_R07C01	6.3546	0.520801
202908540257_R08C01	6.19081	0.628858
202908540277_R01C01	6.17351	0.628923
202908540277_R02C01	8.14896	6.52076
202908540277_R03C01	-1.69314	5.79465
202908540279_R01C01	-4.07779	2.14805
202908540279_R02C01	-6.19842	-11.0964
202908540279_R03C01	-6.31072	-10.7165
202908540279_R04C01	8.09027	6.5318
202908540279_R05C01	5.82425	6.9216
202908540279_R06C01	3.65372	-5.54307
202908540279_R07C01	-1.9247	6.00197
202908540279_R08C01	5.20603	-0.788837
202908540281_R01C01	10.3089	-5.25619
202908540281_R02C01	10.9882	-5.34151
202908540281_R03C01	-4.59953	-3.97349
202908540281_R04C01	-6.20555	-11.0875
202908540281_R05C01	3.81978	-3.77829
202908540281_R06C01	-2.21044	-1.90272
202908540281_R07C01	4.77254	6.49849
202908540281_R08C01	7.77848	5.70184
202915410084_R01C01	-2.79518	-1.77591
202915410084_R02C01	-7.84436	-4.49196
202915410084_R03C01	-3.97487	-2.57475
202915410084_R04C01	-4.02183	-2.53374
202915410084_R05C01	-6.48786	-11.2567
202915410084_R06C01	-1.92871	6.04007
202915410084_R07C01	5.8246	5.68451
202915410084_R08C01	-6.13004	-11.5844
202915460087_R05C01	-3.4511	-0.327533
202915460142_R07C01	-3.06845	-0.75121
202933790110_R04C01	6.67449	6.67038
202944920042_R04C01	-2.8657	-5.98123
202944920042_R05C01	-4.71792	-4.98414
203013210156_R01C01	-3.10158	-0.461223
203020780078_R03C01	-2.73437	-3.17553
203021070042_R02C01	2.87873	9.20156
203021070071_R01C01	11.2606	-2.78377
203026840082_R02C01	-4.00701	-4.24298
203026840100_R01C01	-5.42186	-3.83979
203026840100_R02C01	-5.64886	-3.99313
203026840100_R03C01	-5.08611	-3.75971
203026840100_R04C01	-7.1275	-11.3756
203026840100_R05C01	-6.08212	-11.5925
203026840100_R06C01	7.68159	5.47436
203026840100_R07C01	7.6578	5.75153
203026840100_R08C01	7.52501	5.40676
203030040080_R04C01	-4.26791	-4.1185
203030040080_R05C01	-4.07753	-4.27423
203030040080_R08C01	-5.52273	-3.1148
203030040097_R03C01	-5.21119	-4.51723
203030040097_R04C01	-1.84267	5.92021
203030040097_R05C01	5.54712	5.88692
203030040097_R06C01	10.4071	-5.22204
203030040097_R07C01	6.61147	5.52915
203030040097_R08C01	5.71997	6.47835
203030040154_R04C01	-2.89301	-5.94598
203030040155_R07C01	-4.50041	-3.78025
203030040155_R08C01	2.41631	-11.365
203033880025_R04C01	-3.42593	-5.44332
203033880025_R06C01	-4.31696	-4.15008
203033880028_R01C01	-4.2537	-4.56367
203033880028_R04C01	-4.21717	-4.22364
203033880028_R05C01	-11.4164	2.09075
203033880028_R06C01	-3.90035	-3.82358
203033880029_R03C01	-4.43053	-3.92023
203033880029_R06C01	-4.05436	-3.51394
203033880061_R01C01	-4.87426	-4.91818
203033880061_R02C01	-4.00082	-4.44136
203033880061_R04C01	-3.86482	-4.70273
203033880063_R01C01	-5.54283	-4.24336
203033880063_R03C01	-5.62197	-4.23807
203033880073_R02C01	-5.5297	-4.21317
203033880073_R03C01	-5.54444	-4.17405
203033880113_R02C01	-2.38445	-6.32425
203033880113_R05C01	5.36529	-10.7721
203033880113_R06C01	-2.854	-5.99147
203033880132_R01C01	-2.87059	-5.97293
203033880132_R02C01	-3.88054	-4.21729
203033880136_R02C01	-5.60689	-3.039
203033880136_R05C01	-3.52834	-5.64256
203033880136_R07C01	-6.24528	-4.91117
203033880137_R03C01	-3.95301	-3.71006
203033880137_R06C01	2.41579	-11.3656
203033970041_R02C01	-3.82253	-4.60994
203033970041_R03C01	-5.68945	-5.67877
203033970041_R04C01	-5.68245	-5.67408
203033970042_R04C01	-4.05822	-4.43332
203033970042_R07C01	-5.60181	-3.06344
203033970044_R05C01	-5.41794	-3.18056
203033970044_R06C01	-4.95849	-3.72936
203033970044_R07C01	-4.33948	-3.91029
203033970054_R01C01	-4.25979	-4.16365
203033970072_R03C01	-3.95343	-4.8632
203033970072_R05C01	-4.19035	-4.34169
203033970089_R04C01	-4.9681	-3.4769
203033970089_R05C01	-4.89343	-3.38966
203033970099_R01C01	2.64089	2.38784
203033970099_R02C01	3.77775	-3.74031
203033970099_R03C01	3.81247	-3.73839
203033970099_R04C01	3.12086	-3.37436
203033970099_R05C01	3.72961	-3.72158
203033970099_R06C01	-3.88224	-2.32269
203033970099_R07C01	3.025	-3.32821
203033970099_R08C01	3.75933	-3.74099
203033970109_R08C01	-4.58738	-4.64107
203033970110_R08C01	-5.30672	-3.93073
203033970111_R04C01	-5.50156	-3.13734
203033970113_R04C01	-3.13028	0.913077
203033970113_R08C01	-4.47114	-3.21507
203033970125_R03C01	-5.7125	-2.95625
203033970130_R01C01	-6.30943	-4.89758
203033970134_R06C01	-5.7283	-5.71897
203033970144_R01C01	-5.66962	-5.67467
203033970144_R04C01	-5.34118	-3.2563
203033970147_R03C01	-4.62908	-3.80642
203033970147_R04C01	-4.0506	-4.27218
203033970148_R03C01	-4.23131	-4.00607
203033970149_R06C01	-5.25194	-3.02746
203033970150_R05C01	-4.95662	-3.93616
203033970150_R06C01	-3.95331	-3.72792
203033970154_R01C01	-5.43373	-3.15785
203033970154_R02C01	-3.92669	-4.32942
203033970154_R03C01	2.42859	-11.3762
203033970154_R05C01	-11.3315	4.85152
203033970154_R07C01	-2.36261	-6.34394
203033970154_R08C01	-5.71125	-5.69635
203033970155_R01C01	-3.92746	-4.15695
203033970155_R06C01	-11.3786	2.05213
203033970156_R01C01	-11.4143	2.08633
203034110007_R08C01	-5.49802	-3.03996
203034110008_R01C01	-4.57998	-3.91324
203034110019_R01C01	5.36123	-10.7601
203034110020_R07C01	-5.59791	-4.2286
203034110090_R02C01	-5.69255	-2.96213
203034110090_R04C01	2.40717	-11.3662
203034110090_R05C01	-2.98602	-5.83091
203034110100_R01C01	-5.36525	-3.99231
203034110121_R01C01	-5.63175	-3.22866
203034110121_R03C01	-4.22687	-4.25361
203034110121_R07C01	8.10632	-6.86573
203038290066_R01C01	-4.92667	-4.33819
203038290066_R02C01	-2.95123	-5.86191
203038290066_R08C01	-4.08393	-4.26489
203038290070_R02C01	-4.13804	-4.4974
203038290070_R05C01	-6.31847	-1.59937
203038290073_R05C01	-5.43086	-3.21306
203038290073_R07C01	-3.95015	-3.63591
203038290073_R08C01	-2.39955	-6.31324
203038290075_R02C01	-3.60621	-2.891
203038290077_R01C01	-3.12723	0.549132
203038290077_R02C01	-3.94258	-4.29542
203038290077_R05C01	-6.3652	-3.26027
203038290077_R08C01	-5.48678	-3.18477
203038290082_R01C01	2.41562	-11.3661
203038290082_R02C01	-3.97717	-3.82249
203038290082_R06C01	-4.40102	-3.17291
203038290109_R06C01	-4.96755	-3.72247
203038290110_R04C01	-2.35232	-6.35175
203038290110_R07C01	-3.95131	-3.33706
203038290111_R02C01	-4.21003	-4.00187
203038290111_R03C01	2.41396	-11.3636
203038290113_R04C01	-4.67309	-4.67863
203038290113_R07C01	-4.0302	-4.26624
203038290114_R01C01	-5.61127	-3.03522
203038290114_R05C01	-4.55341	-4.64262
203038290114_R08C01	-5.35992	-3.2501
203038300052_R01C01	-4.1467	-4.27903
203038300052_R04C01	-5.45355	-3.16393
203038300063_R01C01	-4.36699	-4.45517
203038300063_R04C01	-4.0865	-4.4448
203038300084_R07C01	-3.08603	2.06249
203038300084_R08C01	-3.84192	1.93769
203038300093_R02C01	-1.81092	5.88666
203038300093_R03C01	-4.65868	-4.05124
203038300093_R04C01	-6.2354	-11.1019
203038300093_R05C01	11.2105	-5.45967
203038300093_R06C01	11.2144	-5.45708
203038300093_R07C01	6.47989	5.45084
203038300093_R08C01	7.55671	5.98453
203038300151_R04C01	-5.42451	-3.0316
203038300151_R07C01	5.36856	-10.768
203041550030_R01C01	-5.71816	-2.92219
203041550031_R06C01	2.40978	-11.3651
203041550109_R01C01	-5.63224	-3.02122
203045470013_R01C01	-5.76007	-3.98628
203045470013_R02C01	-5.10414	-3.56251
203045470013_R03C01	-5.3404	-3.83708
203045470013_R04C01	-2.85399	-0.000894482
203045470013_R05C01	7.62987	5.14455
203045470013_R06C01	-2.05914	1.32571
203045470013_R07C01	-1.54541	5.63124
203045470013_R08C01	11.5694	2.93527
203045470033_R05C01	6.21603	6.4232
203045470036_R04C01	-6.49678	-0.480386
203045470036_R05C01	6.86786	5.685
203045470036_R06C01	-6.95198	-11.0821
203045470036_R07C01	-4.08357	-3.42512
203045470036_R08C01	10.9105	-5.33329
203045470038_R01C01	-5.17431	-3.71358
203045470073_R04C01	-7.07113	-1.60979
203045470073_R05C01	-2.86579	0.370712
203045470073_R06C01	3.08027	2.64848
203045470073_R07C01	6.39829	5.52925
203045470073_R08C01	7.73105	6.02762
203045470075_R08C01	-4.02384	-2.443
203045470082_R07C01	-3.13177	0.773368
203045470082_R08C01	7.68717	5.53546
203045470083_R08C01	5.15009	-0.218686
203045470138_R01C01	6.06567	5.73002
203045470138_R02C01	4.73019	6.5359
203045470138_R03C01	7.7527	5.63698
203045470138_R04C01	4.87015	6.61412
203045470138_R05C01	-2.55123	-3.59031
203045470138_R06C01	-6.14817	-11.5785
203045470138_R07C01	1.51802	-15.53
203045470138_R08C01	8.61531	10.9591
203045470175_R01C01	5.36488	-10.7685
203045470175_R02C01	-11.6062	-8.18746
203045470175_R03C01	-3.19763	0.578385
203045470175_R04C01	11.572	2.93412
203045470175_R05C01	-3.41987	1.27251
203045470175_R06C01	-3.44377	1.27763
203045470175_R07C01	-3.36455	1.19039
203045470175_R08C01	-3.43933	1.28504
203045470176_R01C01	-3.55769	1.46288
203045470176_R02C01	-3.32802	1.16982
203045470176_R03C01	-3.39917	1.23789
203045470176_R04C01	-3.37065	1.24518
203045470176_R05C01	-3.43029	1.22166
203045470176_R06C01	-3.38907	1.18873
203045470176_R07C01	-3.36476	1.1636
203045470176_R08C01	-3.36443	1.25198
203045470179_R01C01	3.05461	2.62053
203045470179_R02C01	-4.90892	-5.10459
203045470179_R03C01	7.84445	5.62478
203045470179_R04C01	8.52362	10.8573
203045470179_R05C01	-1.51173	5.6016
203045470179_R06C01	-6.40426	-11.4221
203045470179_R07C01	-3.87127	-4.30368
203045470179_R08C01	5.91413	6.99238
203045470192_R08C01	-1.77821	5.85081
203045470217_R01C01	-5.98489	-11.5493
203045470217_R02C01	9.05974	-0.740406
203045470217_R03C01	6.72087	5.76645
203045470217_R04C01	-3.21854	0.872262
203045470217_R05C01	-6.09916	-11.5425
203045470217_R06C01	-1.8974	5.98845
203048410010_R01C01	-5.18246	-3.85021
203048410010_R02C01	-5.09645	-3.63394
203048410010_R03C01	-4.18289	-3.25966
203048410010_R04C01	-5.89316	-4.04003
203048410010_R05C01	-5.71322	-4.02189
[truncated: 16,538 more rows]
