# Supplementary material for: An Integrated Epigenomic and Genomic View on Phyllodes and Phyllodes-Like Breast Tumors
Source: Preprints.org preprint supplement (doi:10.20944/preprints202112.0366.v1), 2021-12-22
Supplement: Supplementary file 1 [file supplementary]

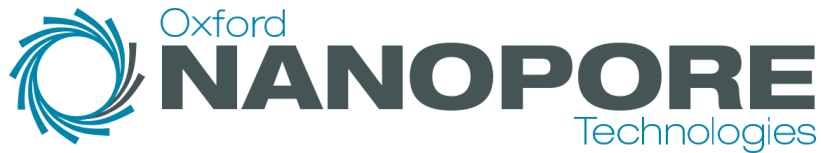

## Run Info

|                 |                                      |
|-----------------|--------------------------------------|
| Host Name       | meqneuropat17 (localhost)            |
| Experiment Name | B1992_24268_20211126_BC12            |
| Sample ID       | B1992_24268_20211126_BC12            |
| Run ID          | b1e50e6a-ec99-4990-af6d-7ff34492d20d |
| Flow Cell Id    | FAQ51001                             |
| Start Time      | November 26, 10:30                   |
| Run Length      | 2h 5m                                |

## Run Summary

|                 |           |
|-----------------|-----------|
| Reads Generated | 198.16 K  |
| Passed Bases    | 133.69 Mb |
| Failed Bases    | 25.04 Mb  |
| Estimated Bases | 150.13 Mb |

## Run Parameters

|                          |                                                     |
|--------------------------|-----------------------------------------------------|
| Flow Cell Type           | FLO-MIN106                                          |
| Kit                      | SQK-RBK004                                          |
| Basecalling              | on                                                  |
| Barcoding                | barcoding_kits=['SQK-RBK004',]                      |
| Specified Run Length     | 72 hours                                            |
| FAST5 Output             | Enabled                                             |
| FAST5 Output Options     | zlib_compress,fastq,raw                             |
| FAST5 Reads per File     | 400                                                 |
| FASTQ Output             | Enabled                                             |
| FASTQ Reads per File     | 400                                                 |
| BAM Output               | Disabled                                            |
| Active Channel Selection | Enabled                                             |
| Mux Scan Period          | 1 hour 30 minutes                                   |
| Bulk File Output         | Enabled                                             |
| Bulk Output Options      | raw=[[1,512]],events=[[1,512]],read_table=[[1,512]] |
| Initial Bias Voltage     | -180 mV                                             |

## Versions

|              |         |
|--------------|---------|
| MinKNOW      | unknown |
| MinKNOW Core | 4.1.2   |
| Bream        | 6.1.4   |
| Guppy        | 4.2.2   |

Cumulative Output Reads

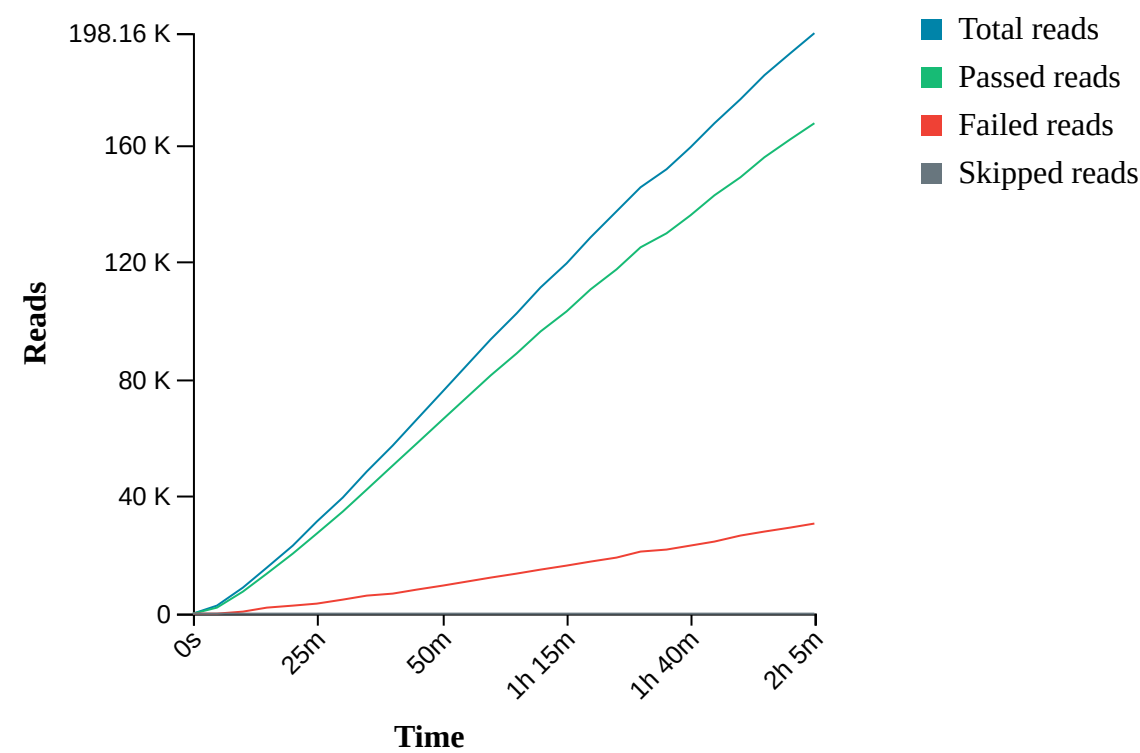

Cumulative Output Bases

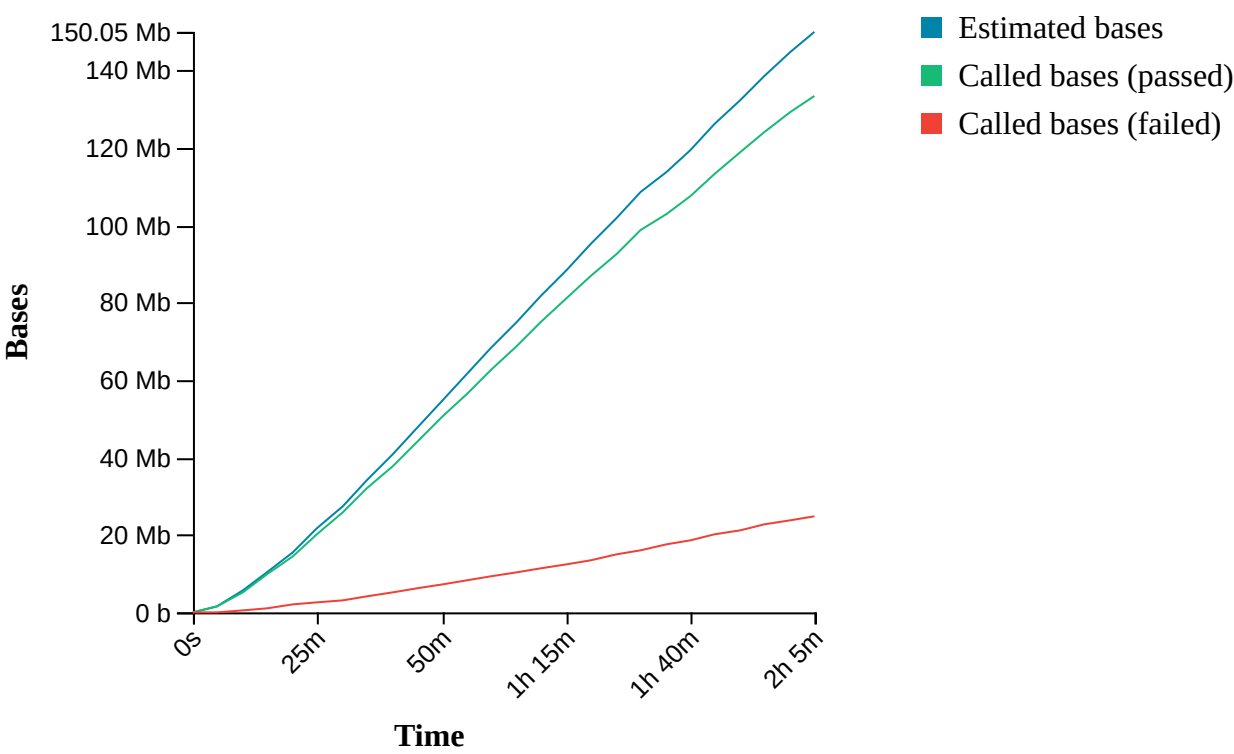

**Read Length Histogram Estimated Bases - Outliers Discarded**

Estimated N50: 1.06 K

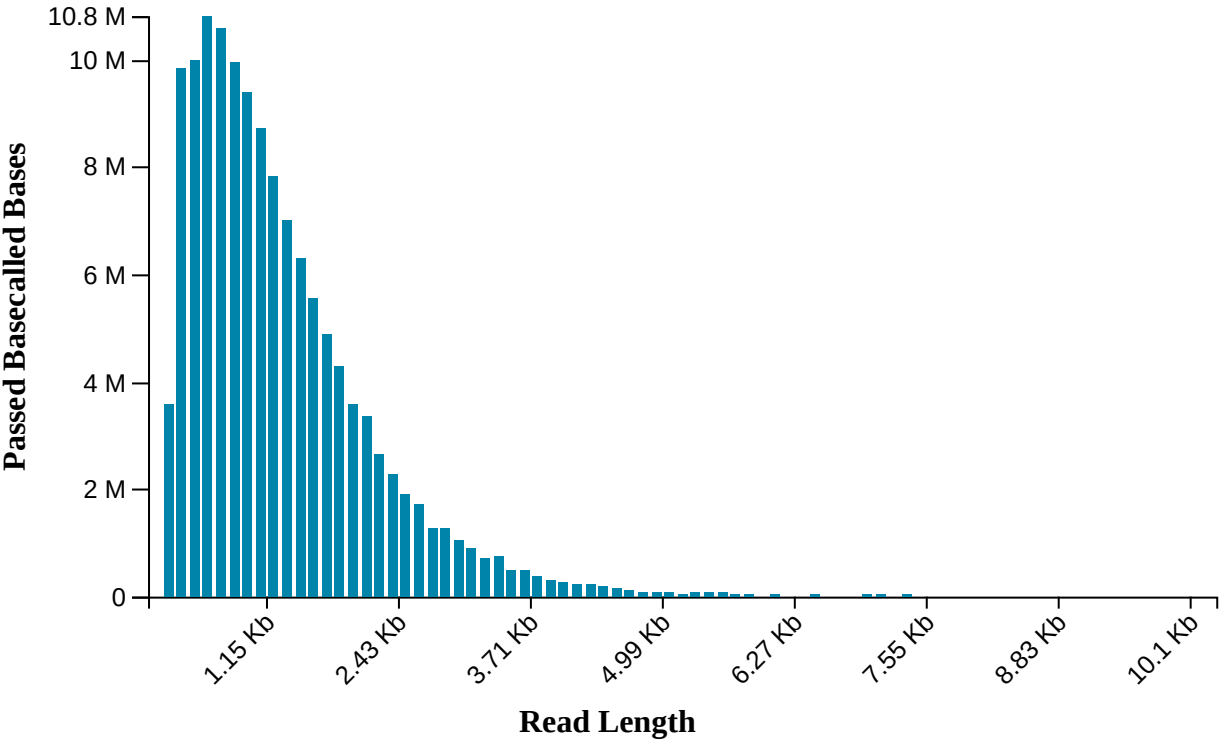

**Read Length Histogram Basecalled Bases - Outliers Discarded**

Estimated N50: 1.05 K

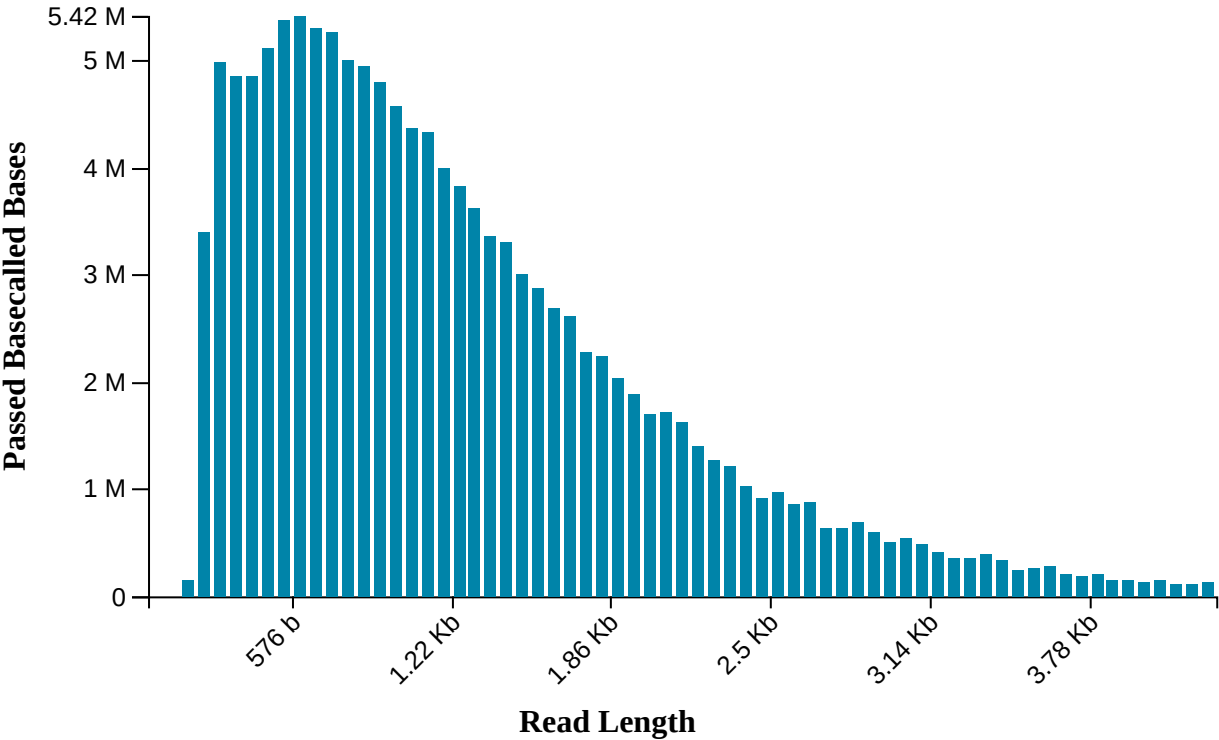

**Read Length Histogram Estimated Bases**

Estimated N50: 1.06 K

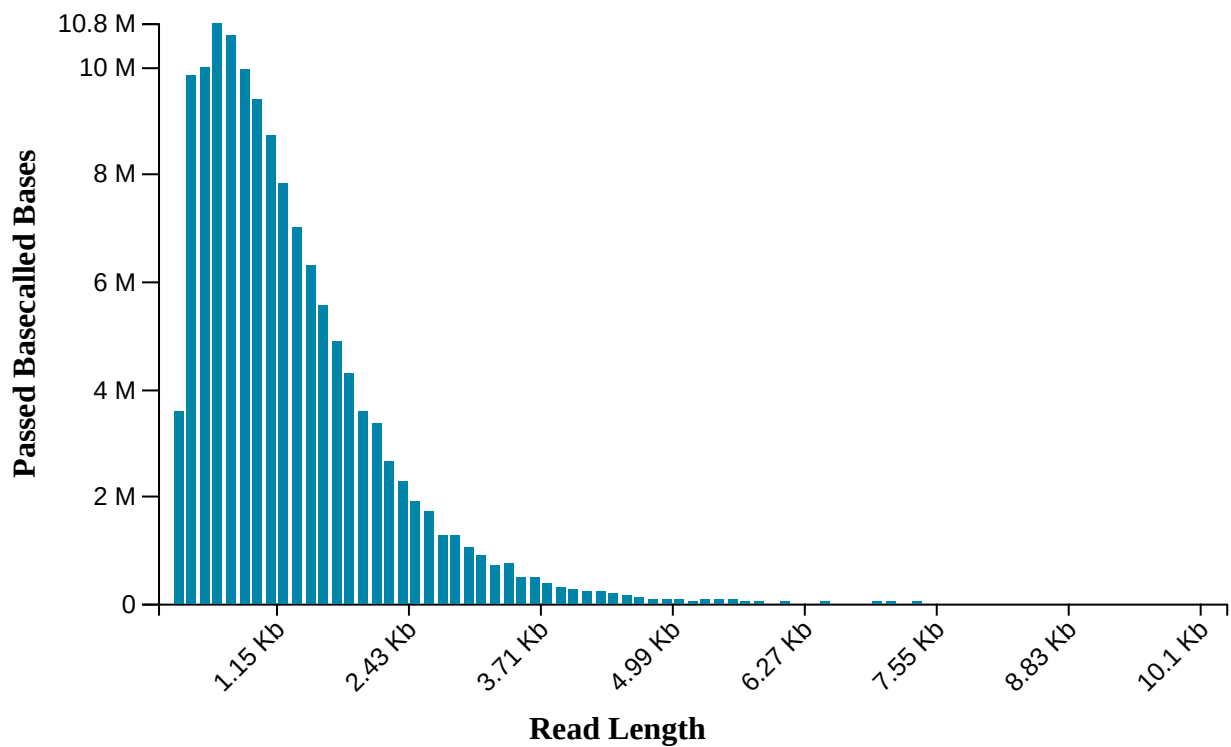

**Read Length Histogram Basecalled Bases**

Estimated N50: 1.05 K

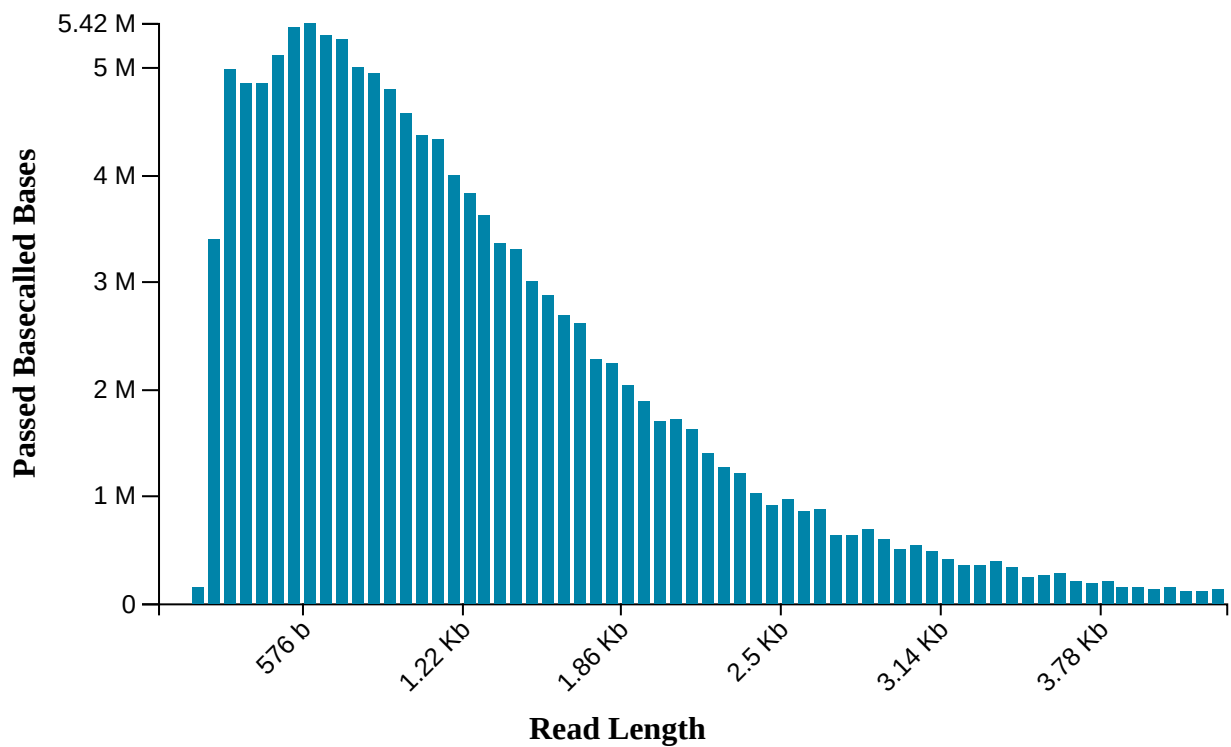

Barcode Read Counts

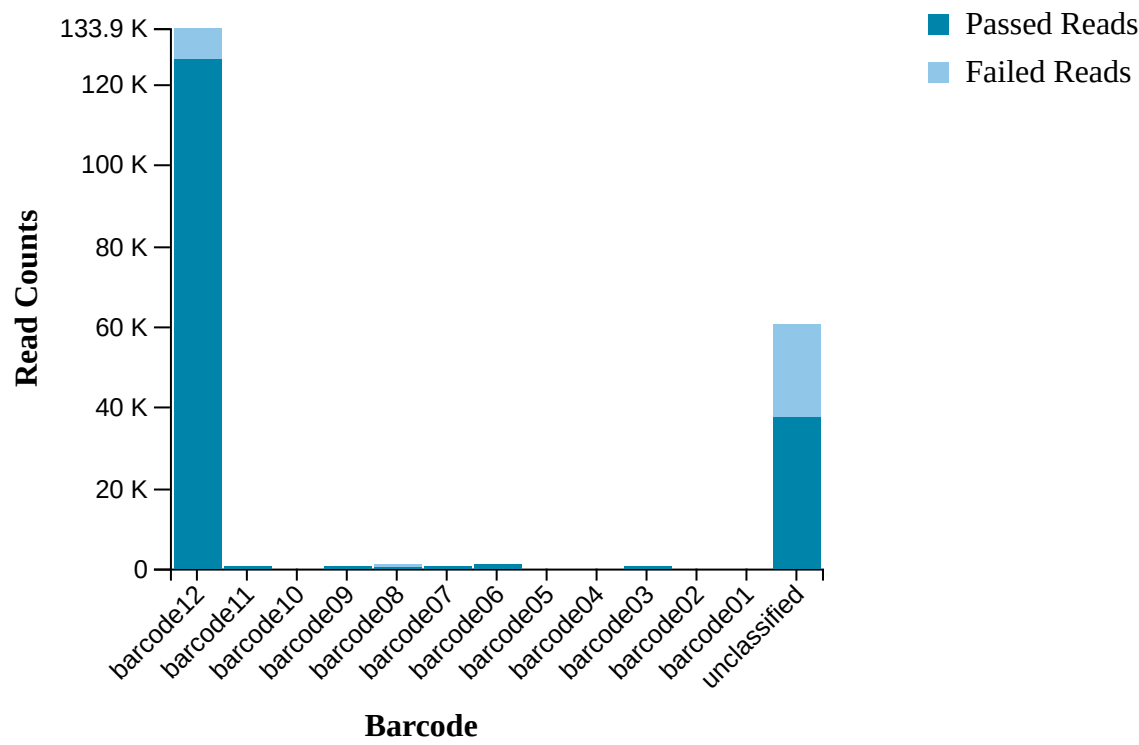

Barcode Read Counts

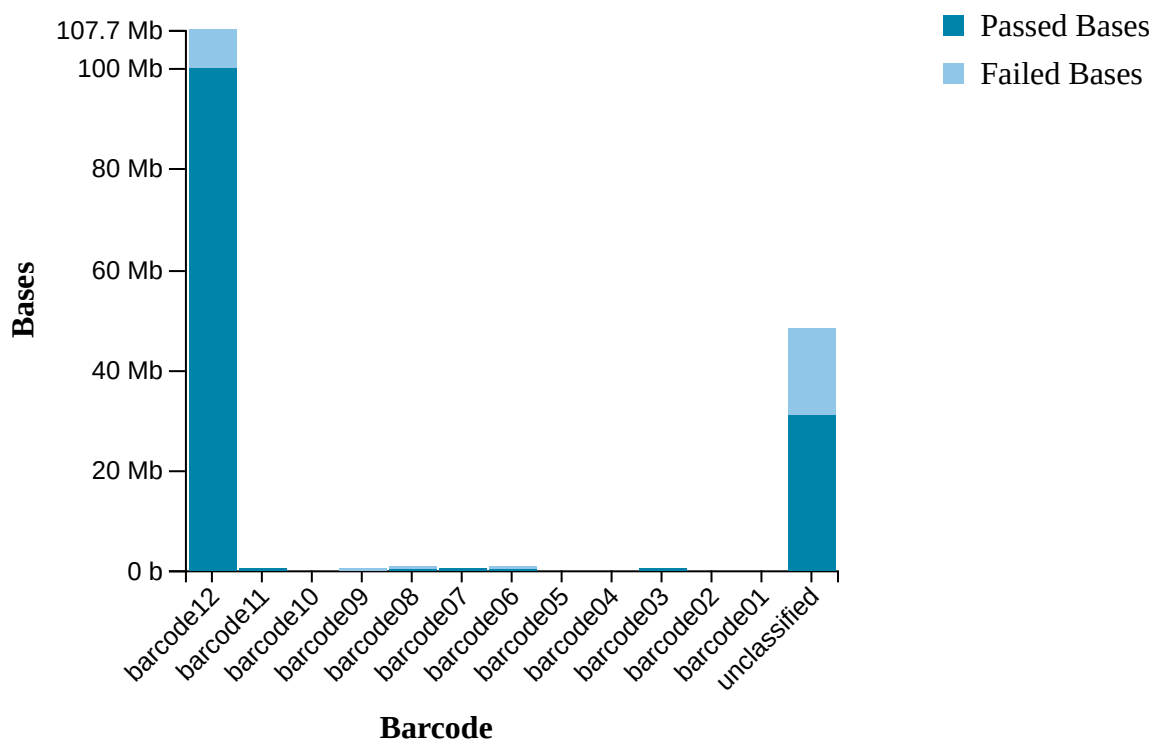

Duty Time Grouped

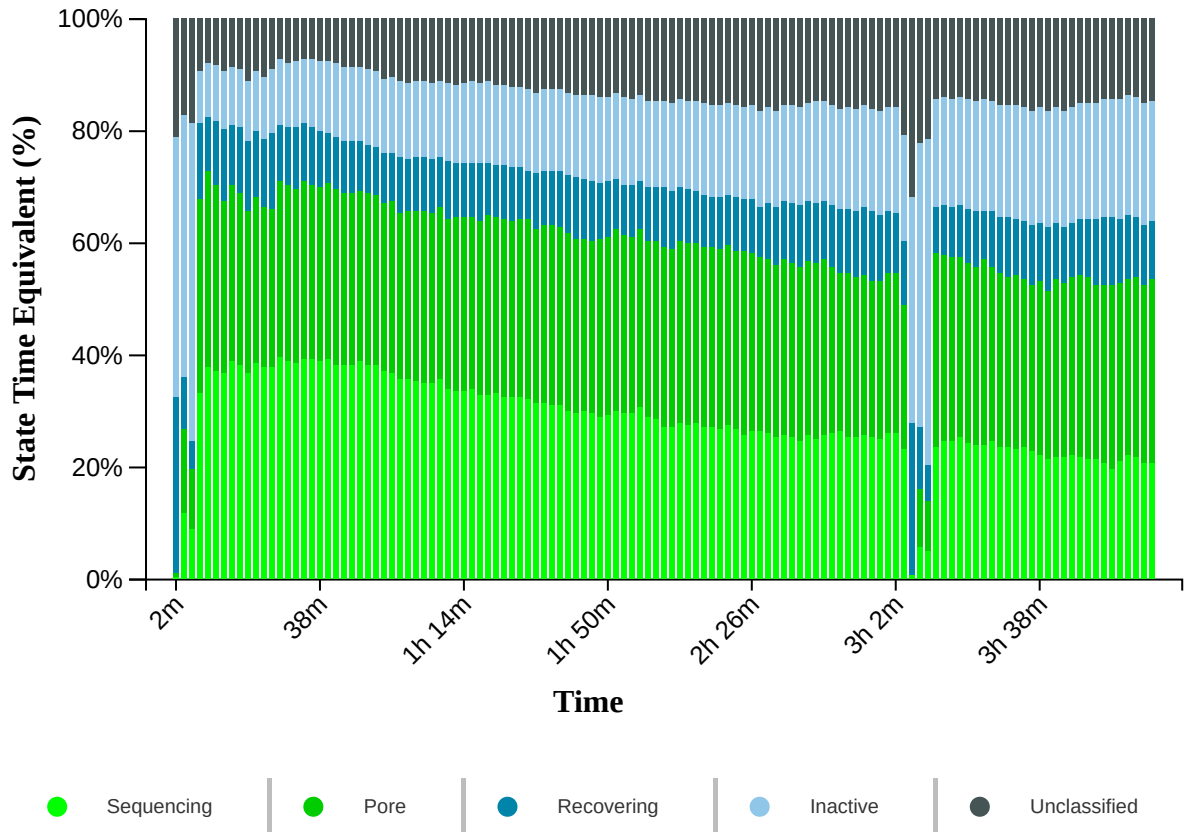

Duty time Categorized

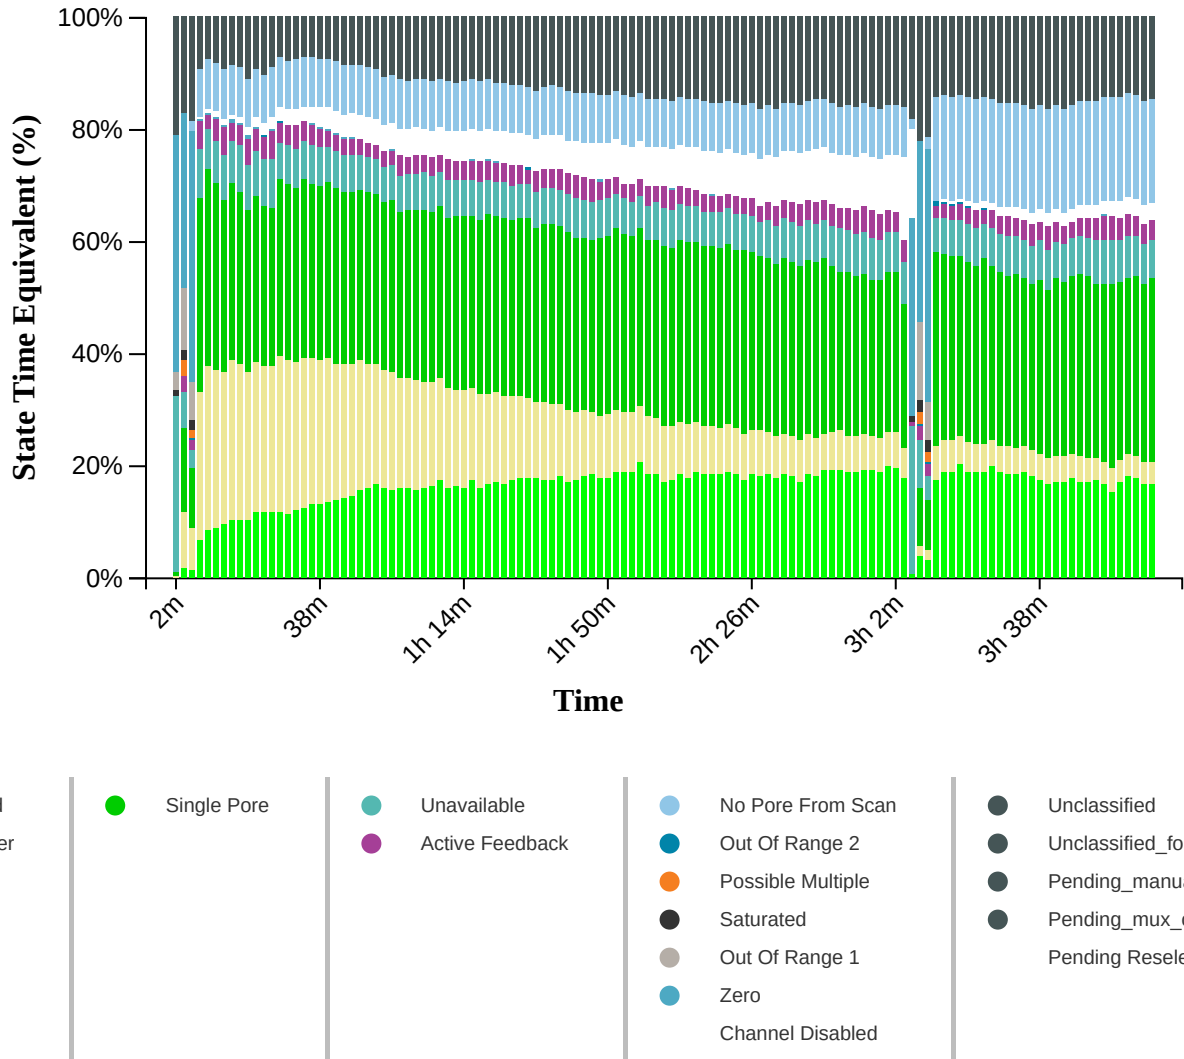

Mux Scan Grouped

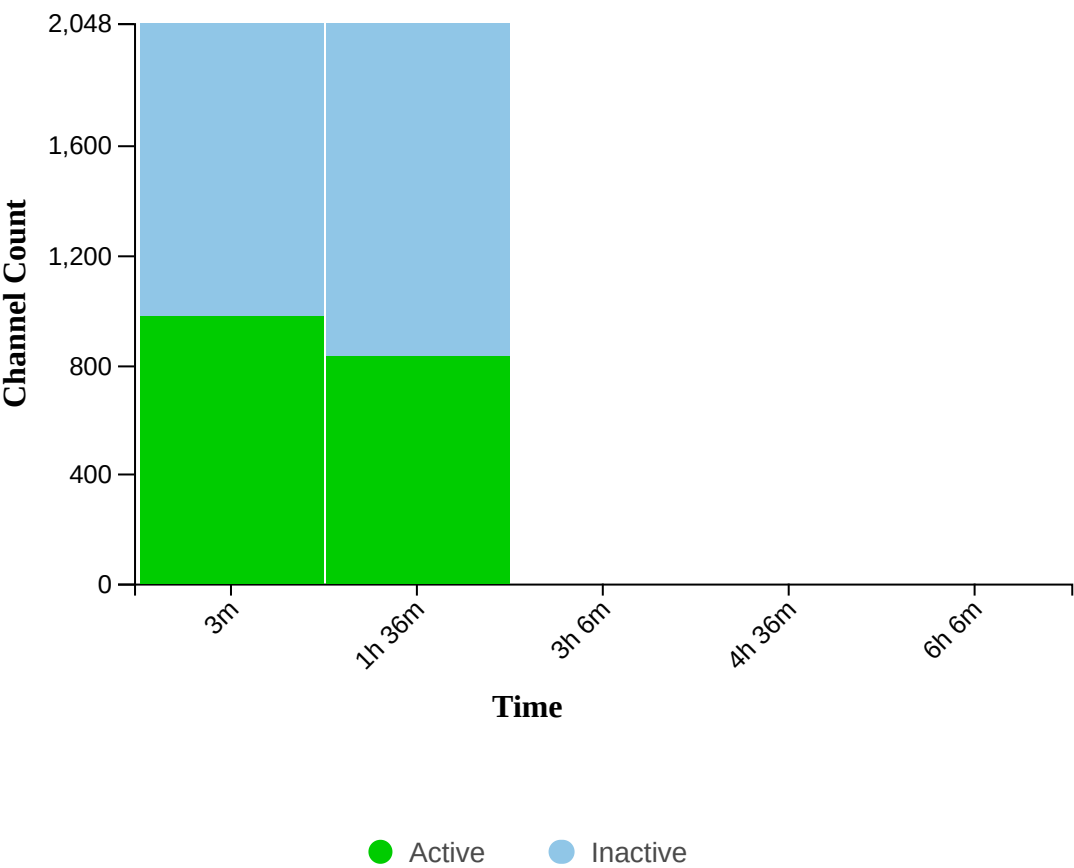

Mux Scan Categorised

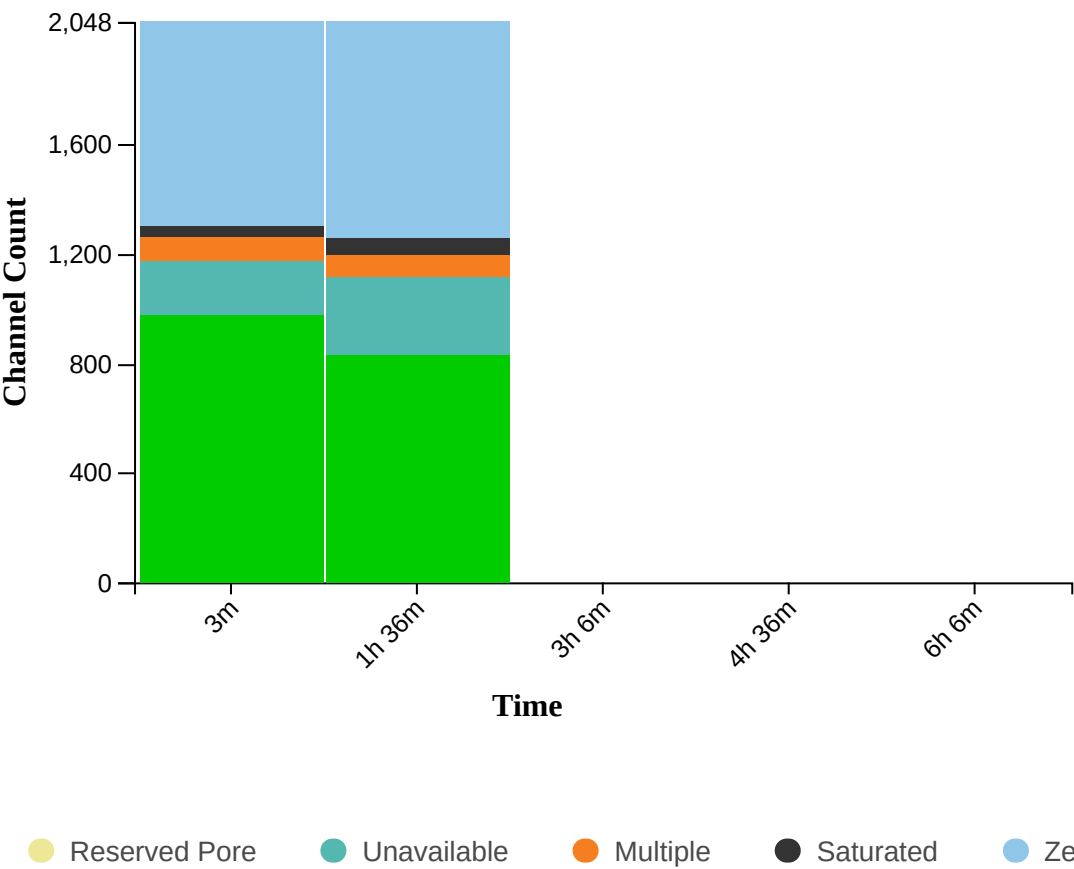

Temperature History.

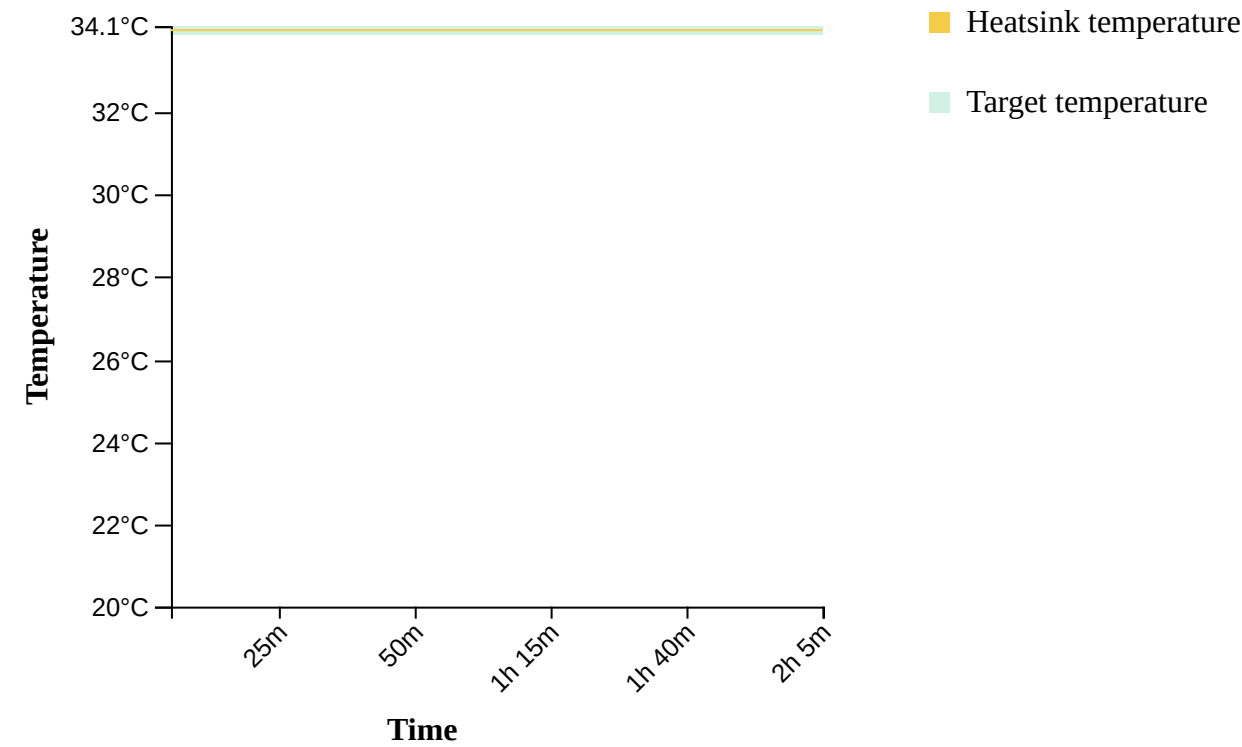

Bias Voltage History.

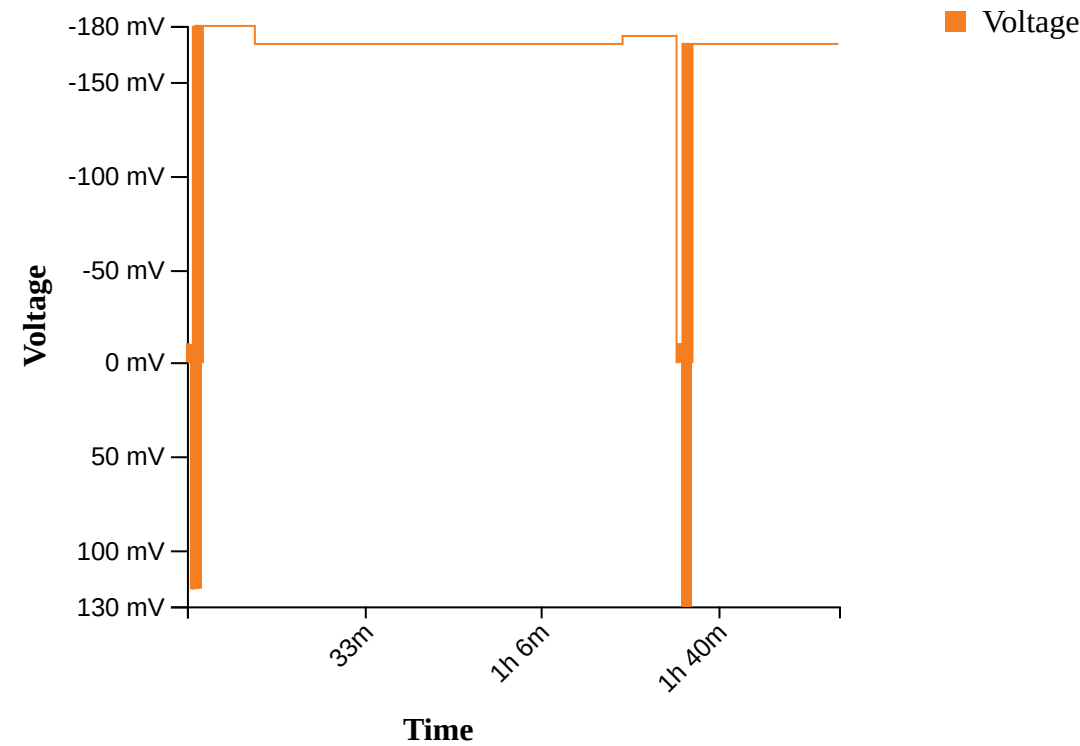

Translocation Speed

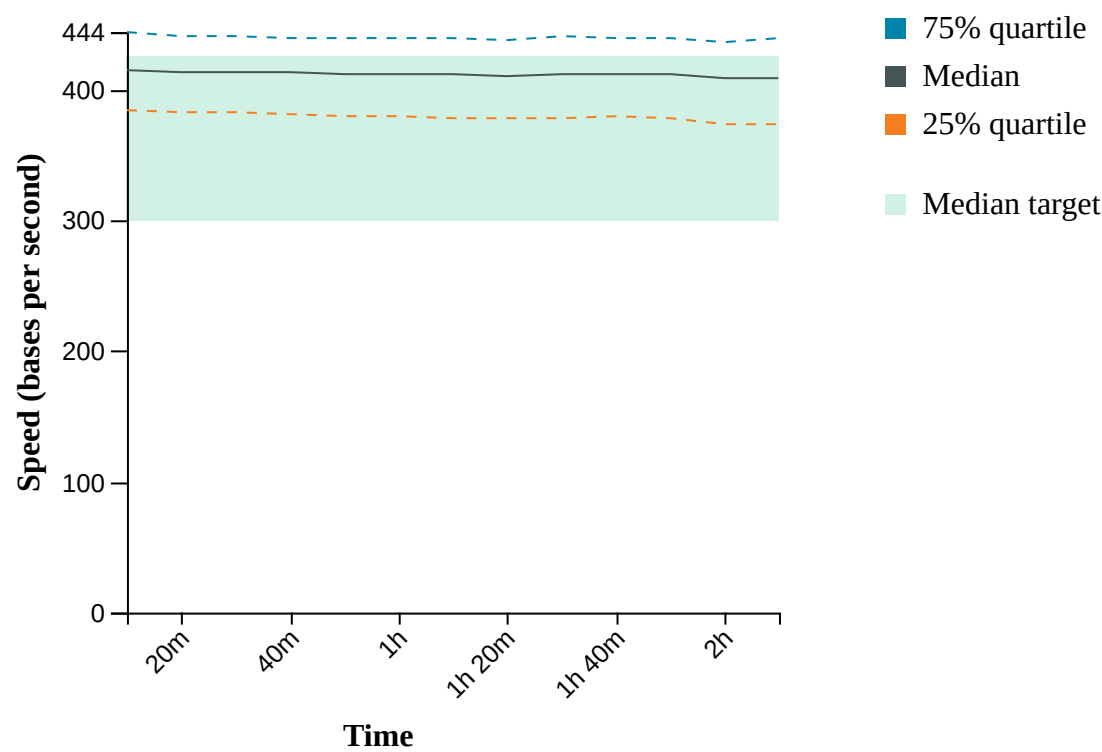

QScore

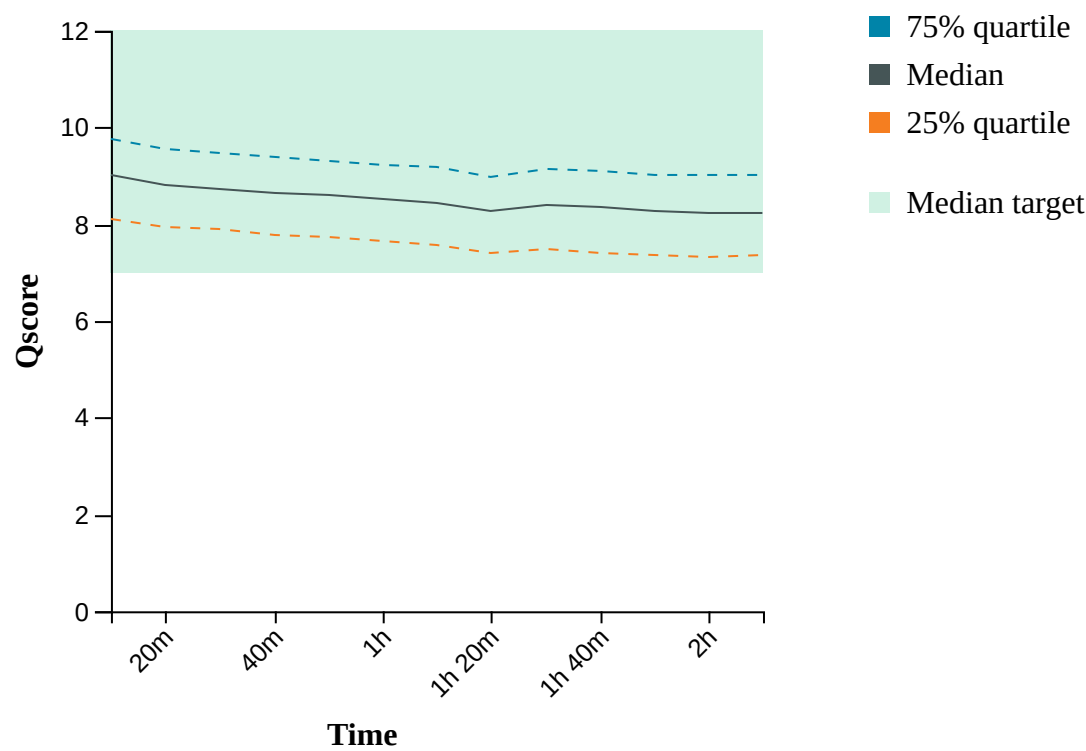

**Disk Write Performance**

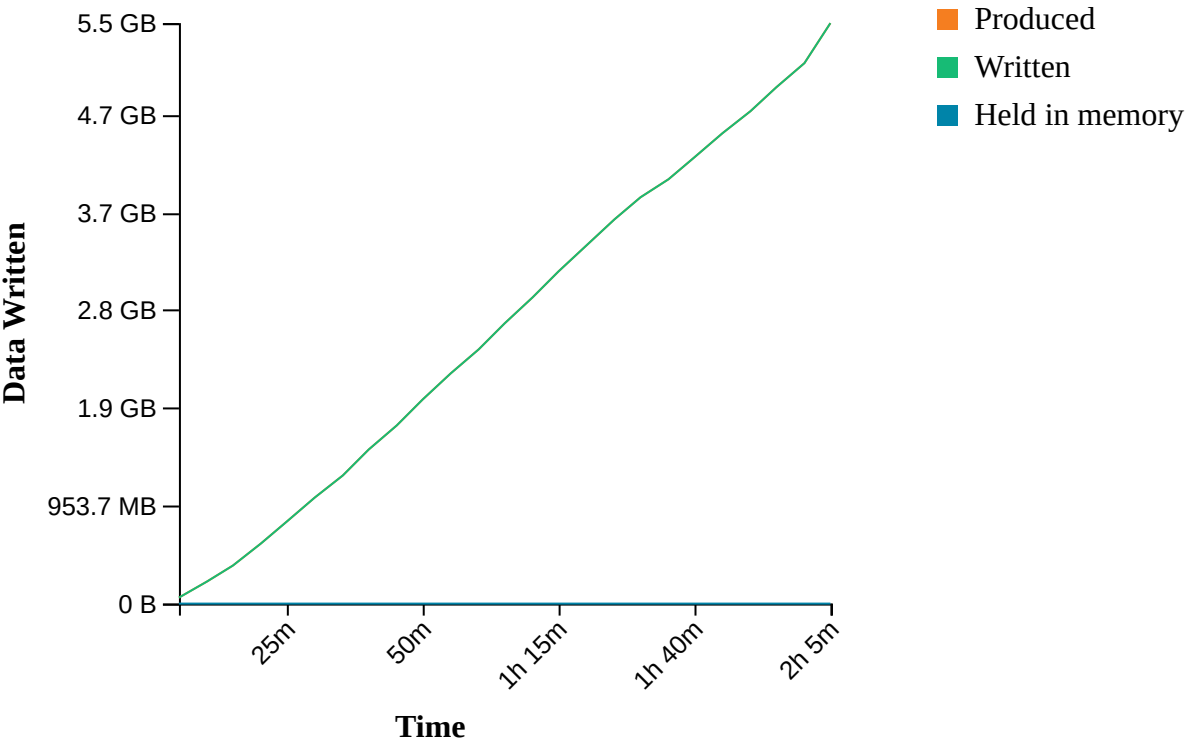

### **Run Debug Messages**

- Mux scan for flow cell FAQ51001 has found a total of 835 pores. 417 pores available for immediate sequencing November 26, 12:08
- Performing Mux Scan November 26, 12:05
- Mux scan for flow cell FAQ51001 has found a total of 977 pores. 467 pores available for immediate sequencing November 26, 10:35
- Performing Mux Scan November 26, 10:32
- Starting sequencing procedure November 26, 10:32
- Waiting up to 300 seconds for temperature to stabilise at 34.0°C November 26, 10:31
